# Supplementary figures and images for: Screening of prognostic biomarkers for endometrial carcinoma based on a ceRNA network
Source: PeerJ journal article supplement (doi:10.7717/peerj.6091), 2018-12-10

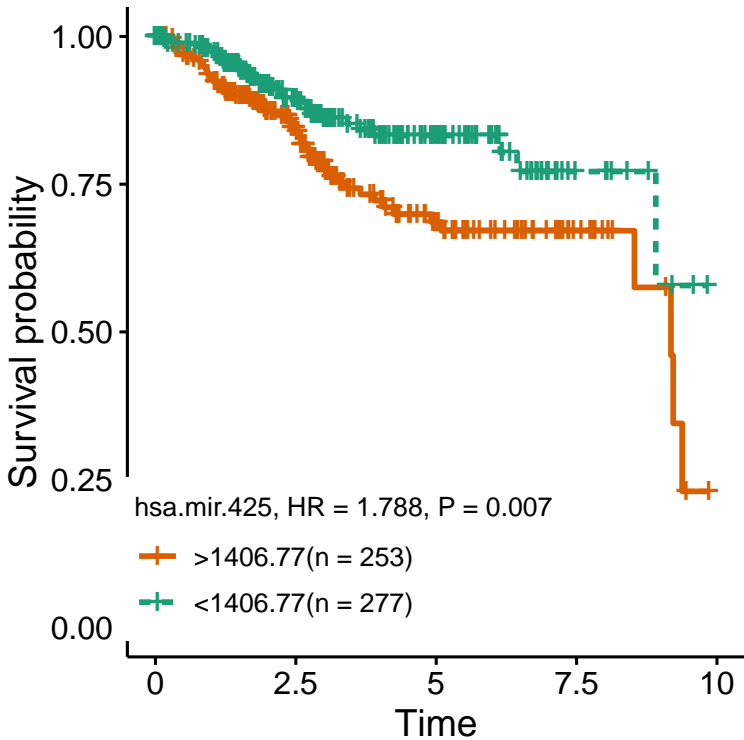

Supplement: Table_S10.zip [file Table_S10.zip]

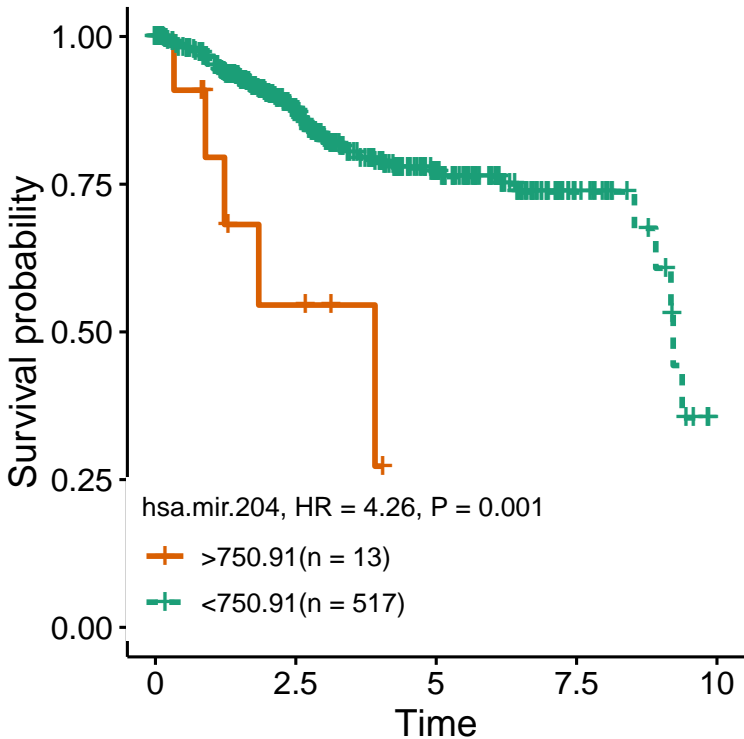

Supplement: Table_S10.zip [file Table_S10.zip]

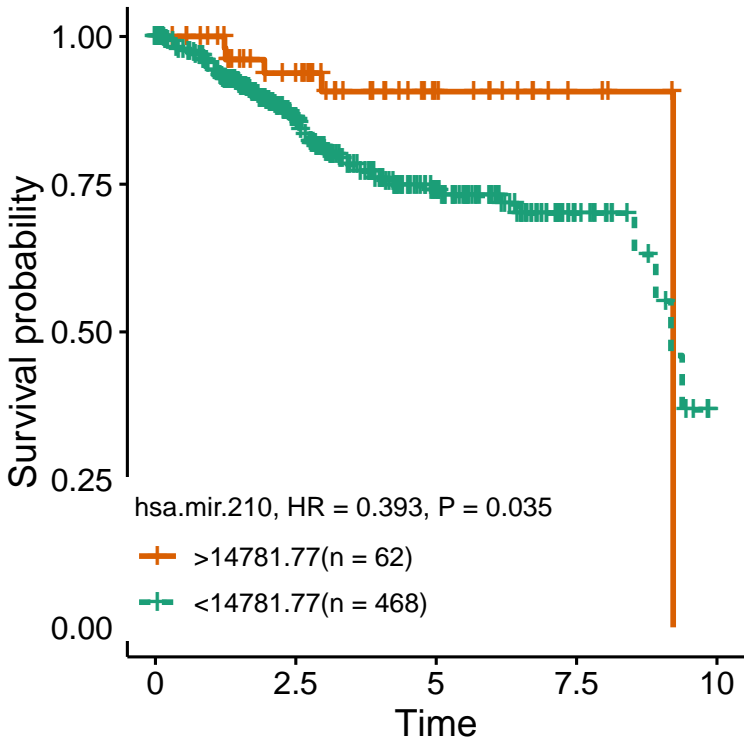

Supplement: Table_S10.zip [file Table_S10.zip]

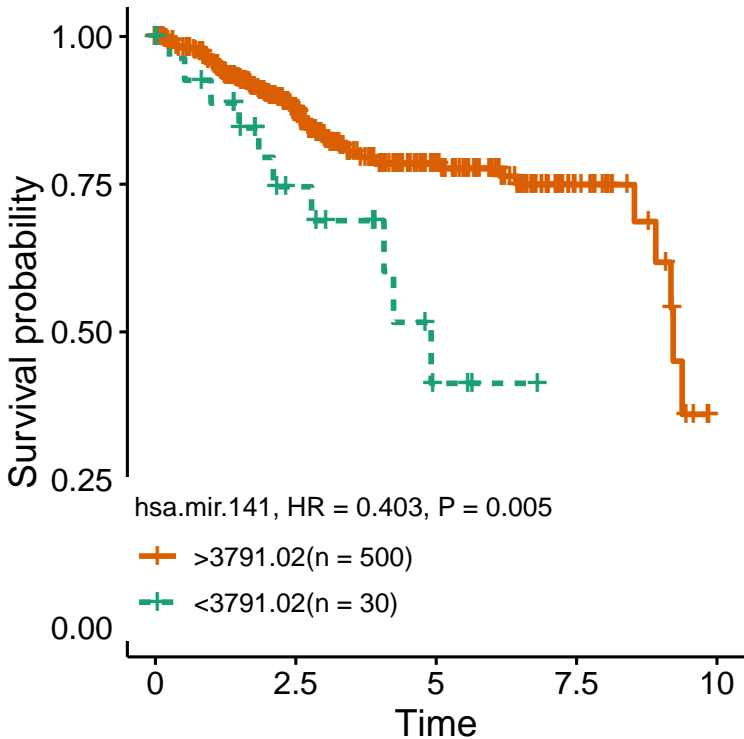

Supplement: Table_S10.zip [file Table_S10.zip]

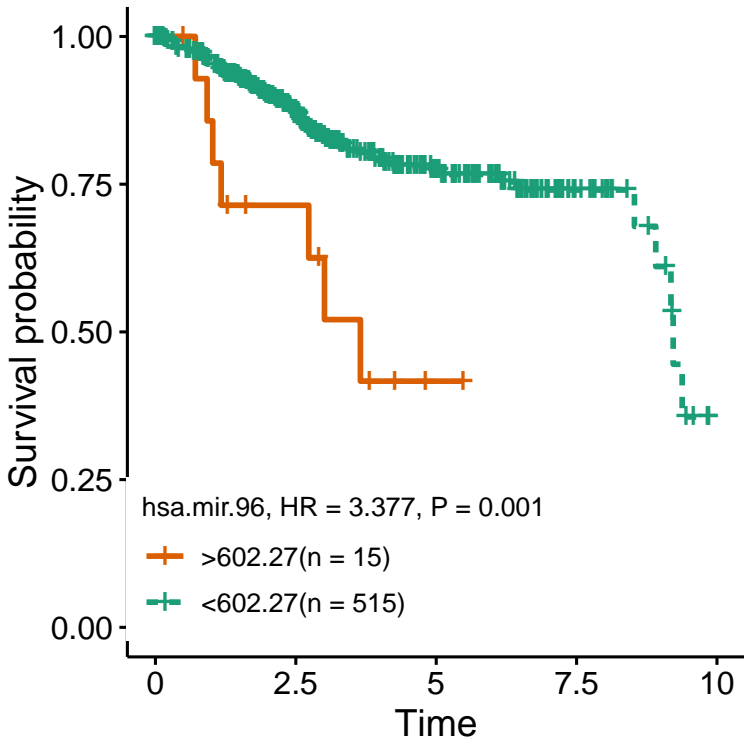

Supplement: Table_S10.zip [file Table_S10.zip]

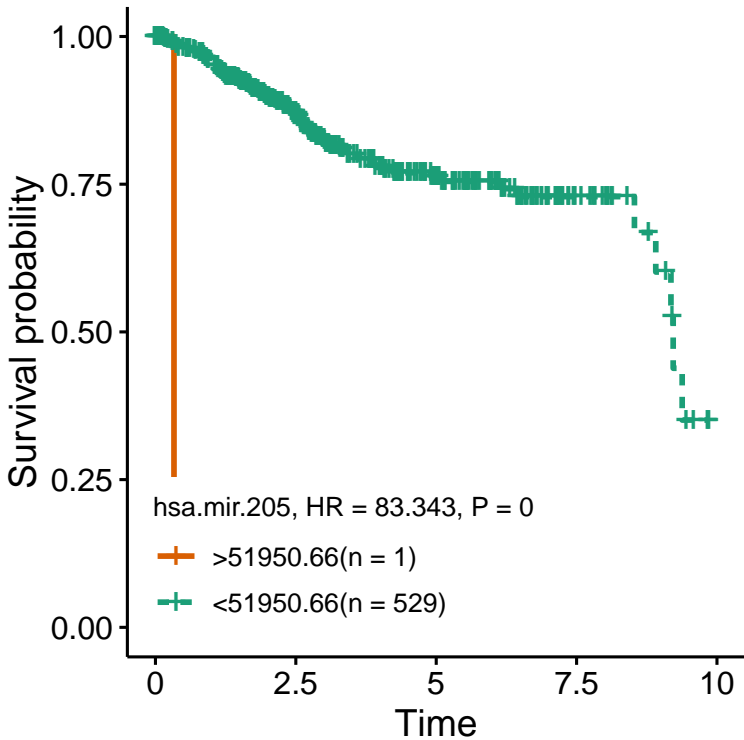

Supplement: Table_S10.zip [file Table_S10.zip]

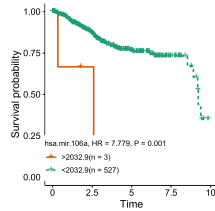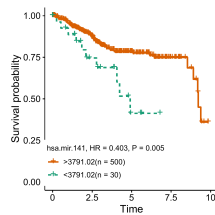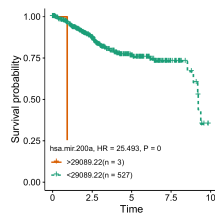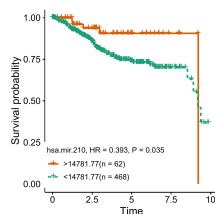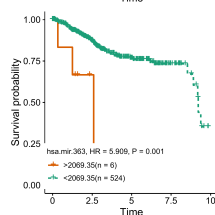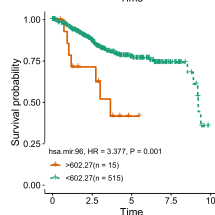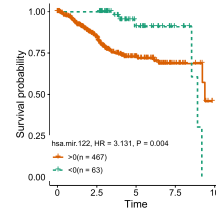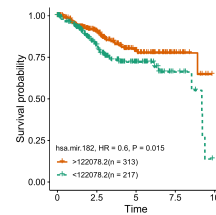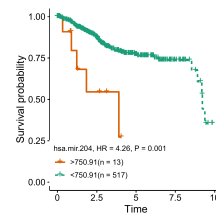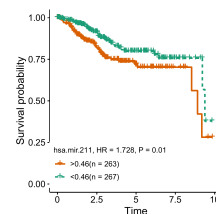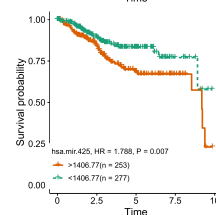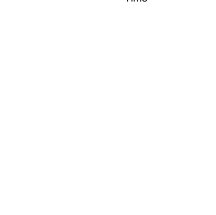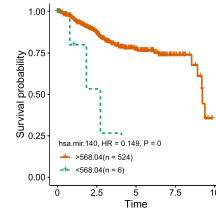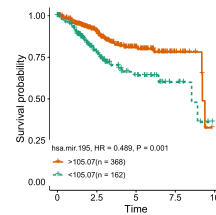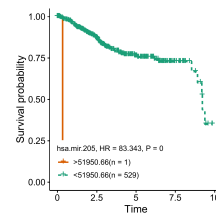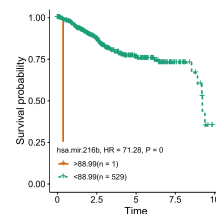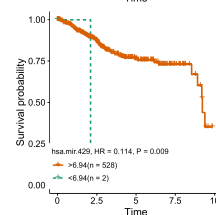

Supplement: Table_S10.zip [file Table_S10.zip]

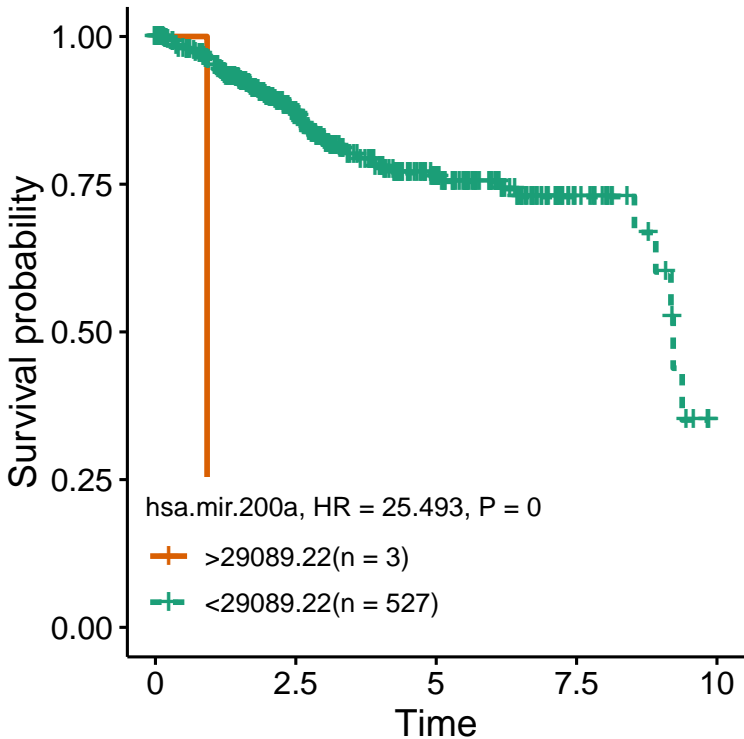

Supplement: Table_S10.zip [file Table_S10.zip]

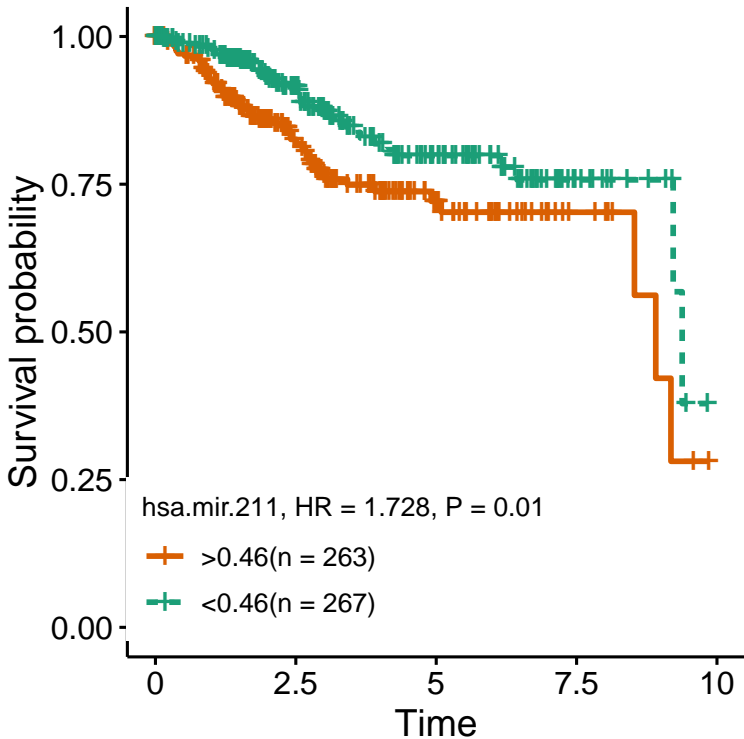

Supplement: Table_S10.zip [file Table_S10.zip]

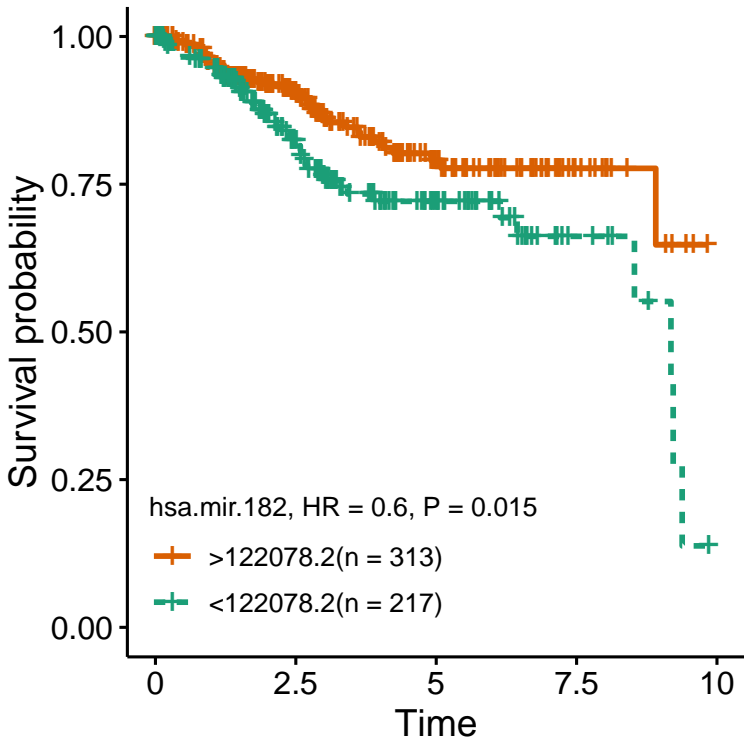

Supplement: Table_S10.zip [file Table_S10.zip]

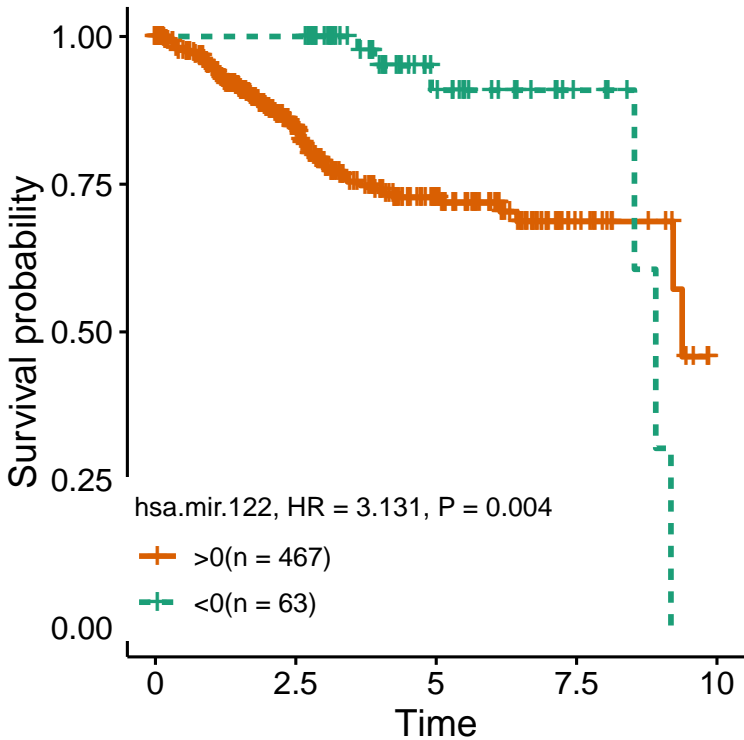

Supplement: Table_S10.zip [file Table_S10.zip]

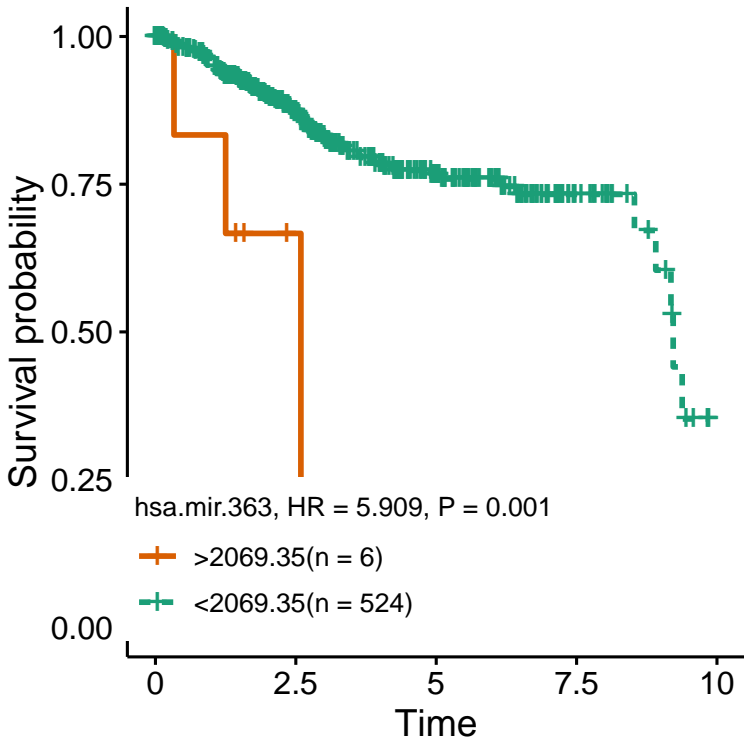

Supplement: Table_S10.zip [file Table_S10.zip]

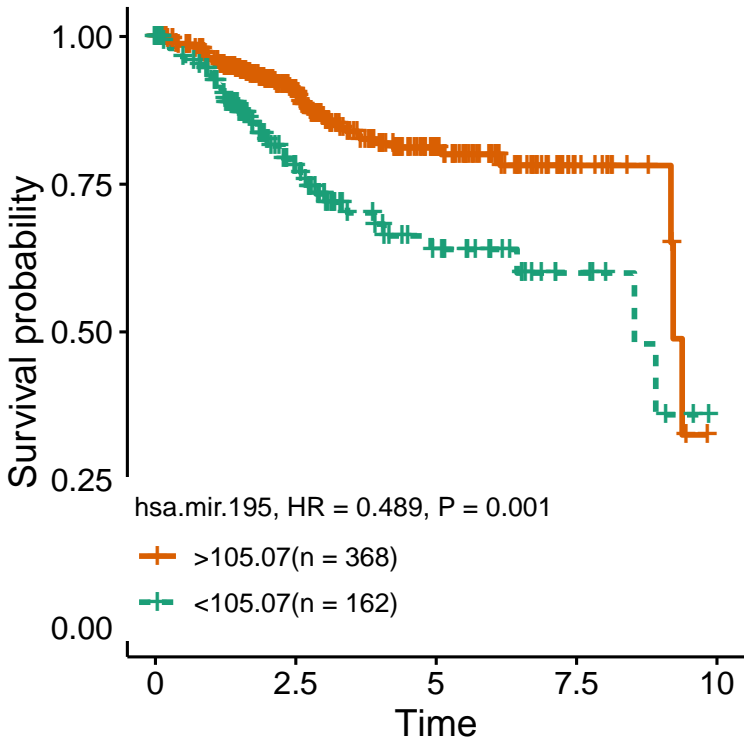

Supplement: Table_S10.zip [file Table_S10.zip]

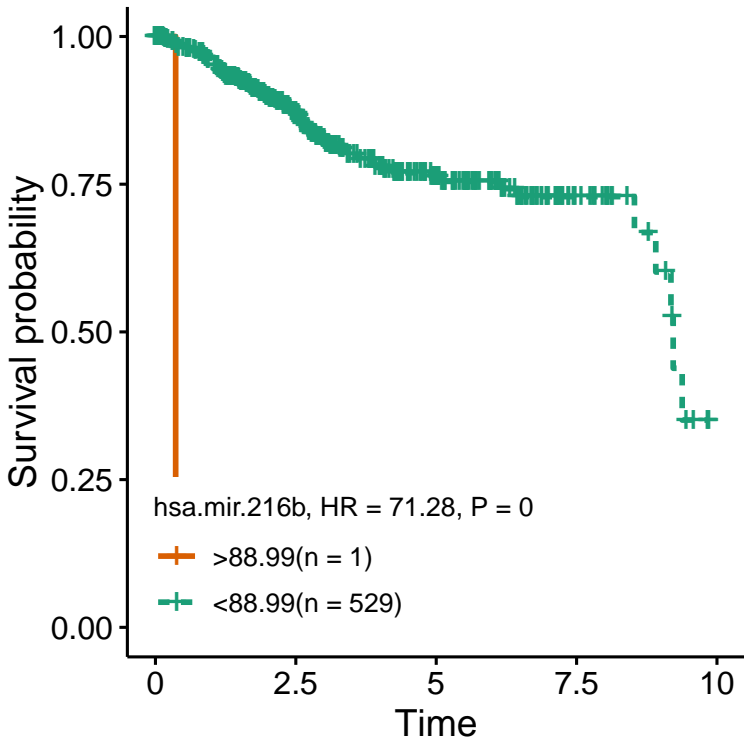

Supplement: Table_S10.zip [file Table_S10.zip]

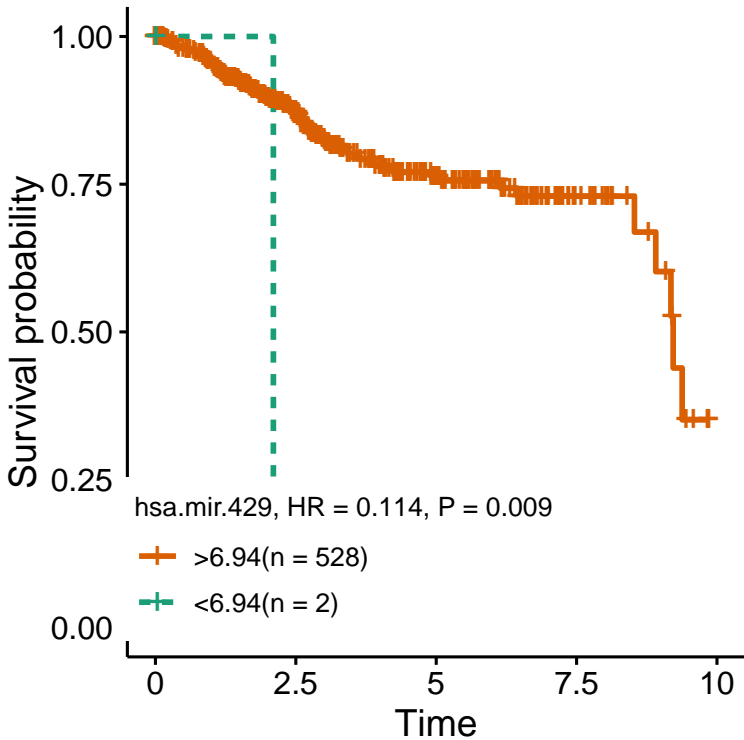

Supplement: Table_S10.zip [file Table_S10.zip]

Survival probability

1.00  
0.75  
0.50  
0.25  
0.00

0

2.5

5

7.5

10

Time

hsa.mir.140, HR = 0.149, P = 0

+ >568.04(n = 524)

+ <568.04(n = 6)

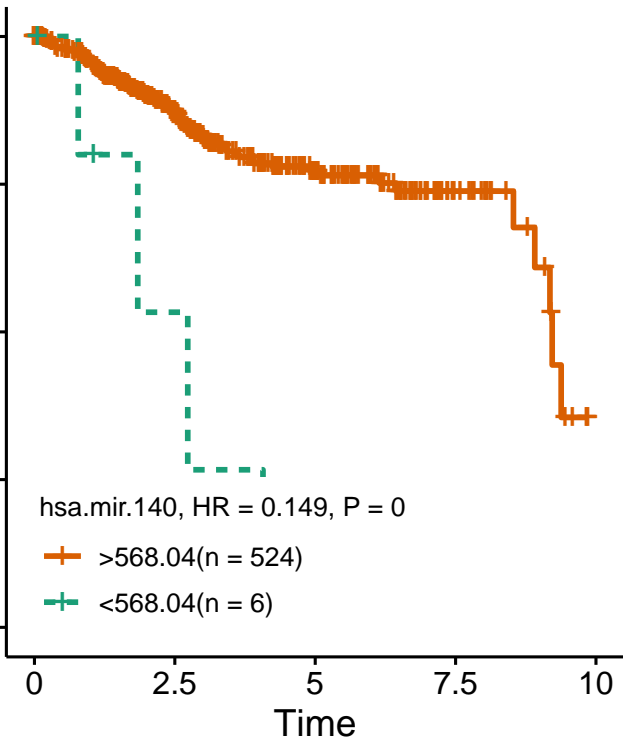

Supplement: Table_S10.zip [file Table_S10.zip]

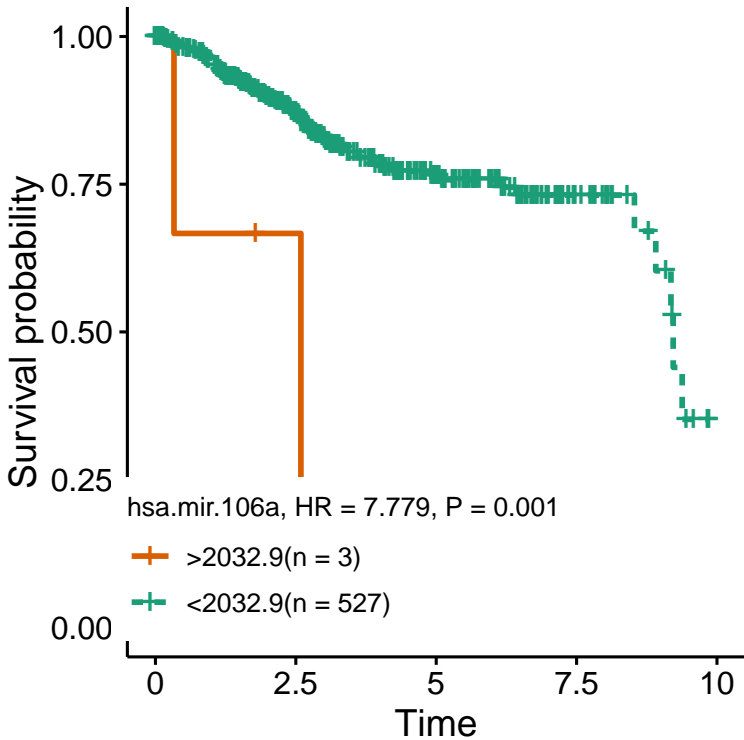

Supplement: Table_S10.zip [file Table_S10.zip]

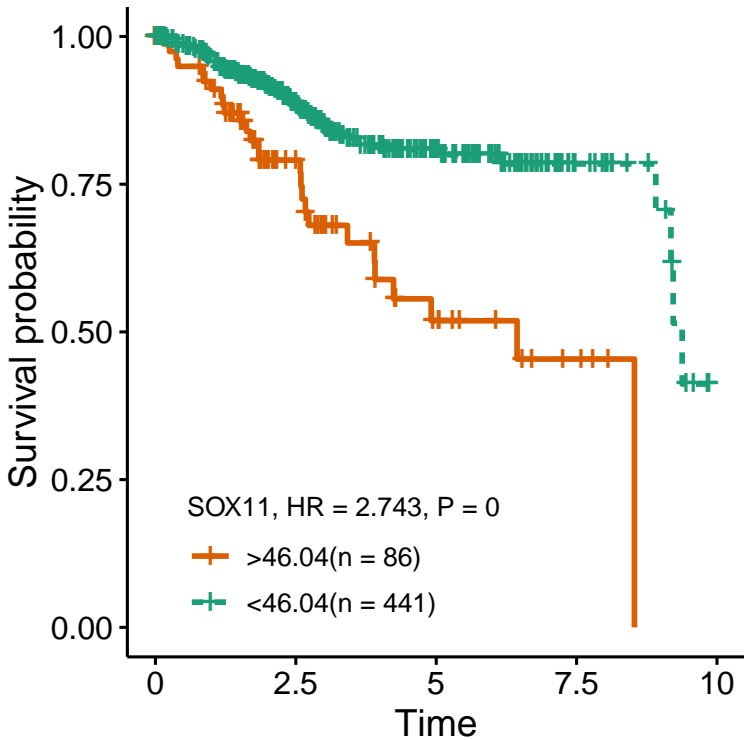

Supplement: Table_S11.zip [file Table_S11.zip]

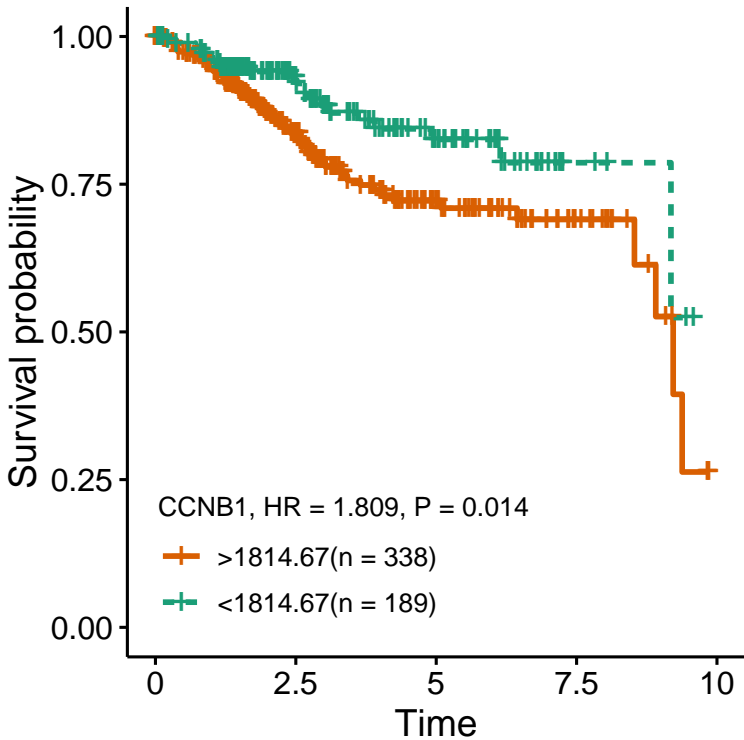

Supplement: Table_S11.zip [file Table_S11.zip]

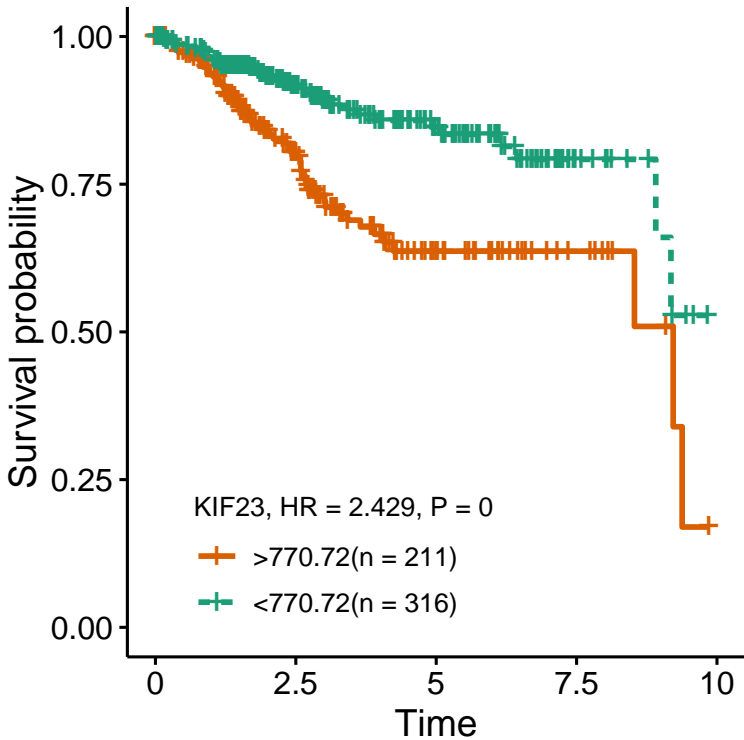

Supplement: Table_S11.zip [file Table_S11.zip]

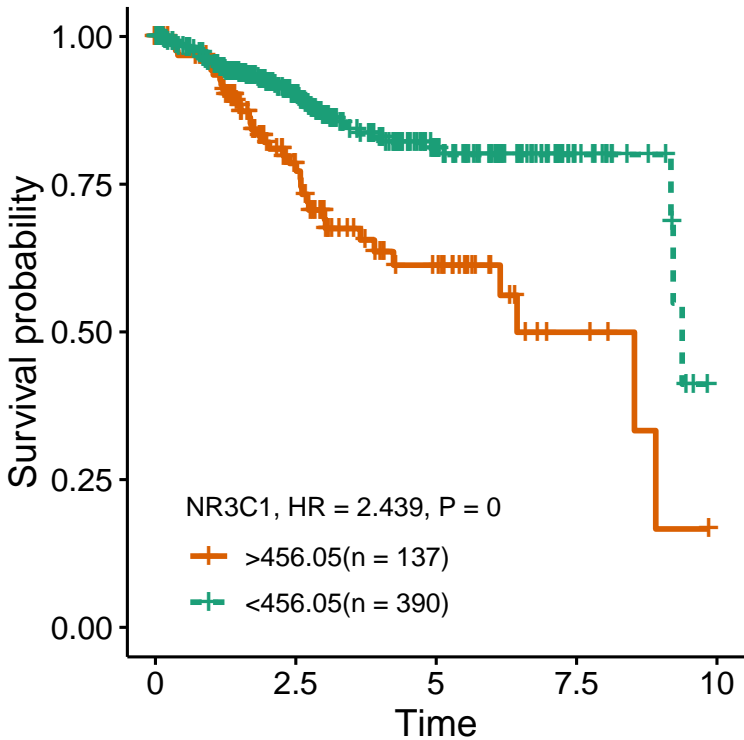

Supplement: Table_S11.zip [file Table_S11.zip]

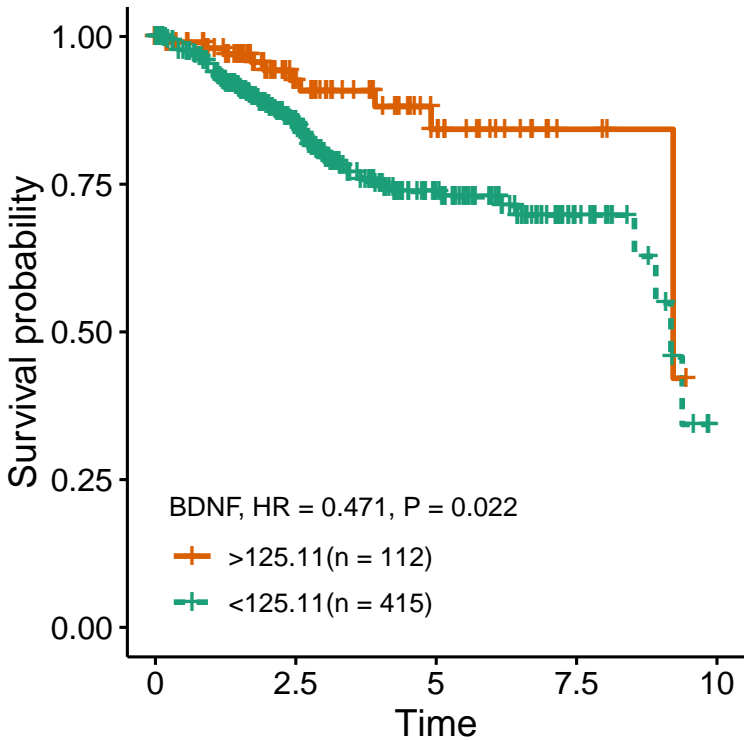

Supplement: Table_S11.zip [file Table_S11.zip]

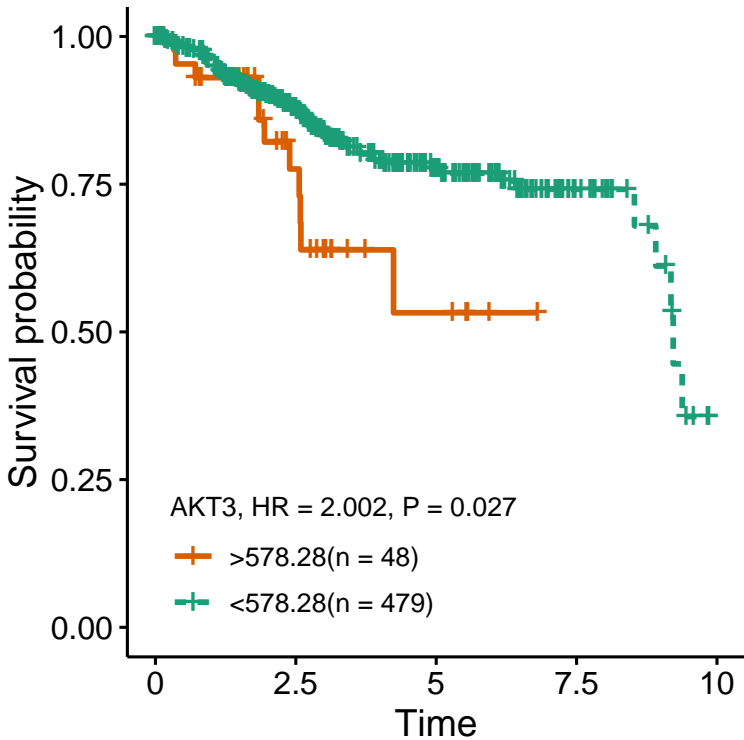

Supplement: Table_S11.zip [file Table_S11.zip]

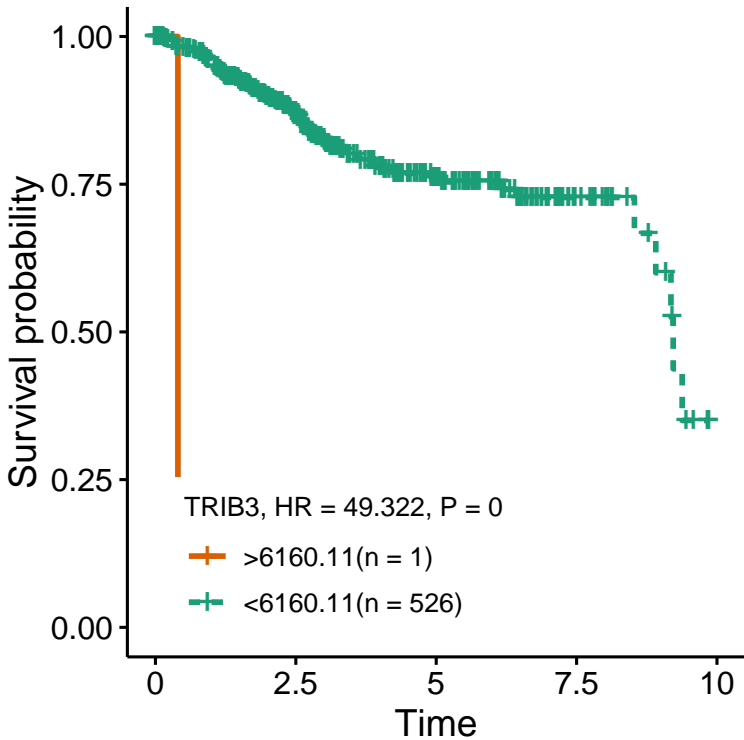

Supplement: Table_S11.zip [file Table_S11.zip]

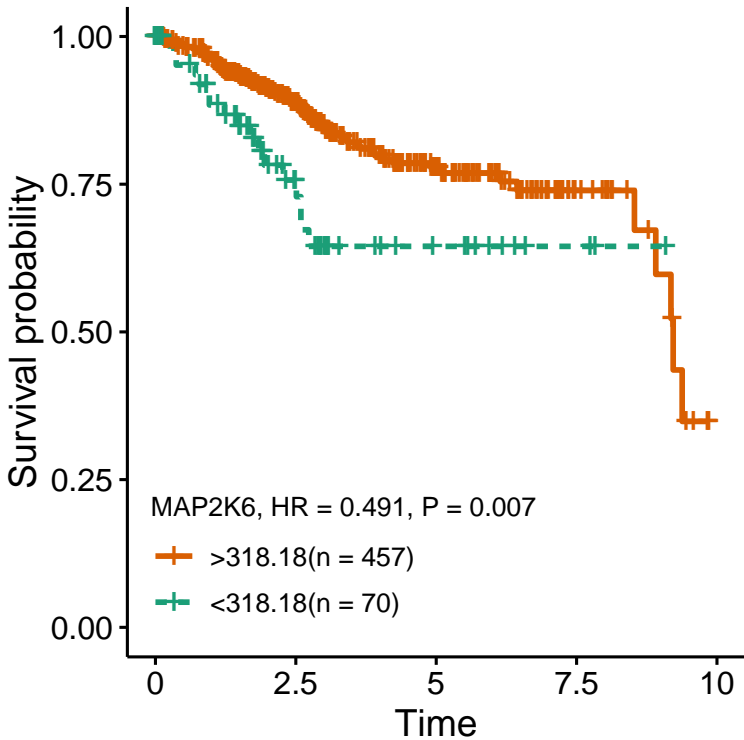

Supplement: Table_S11.zip [file Table_S11.zip]

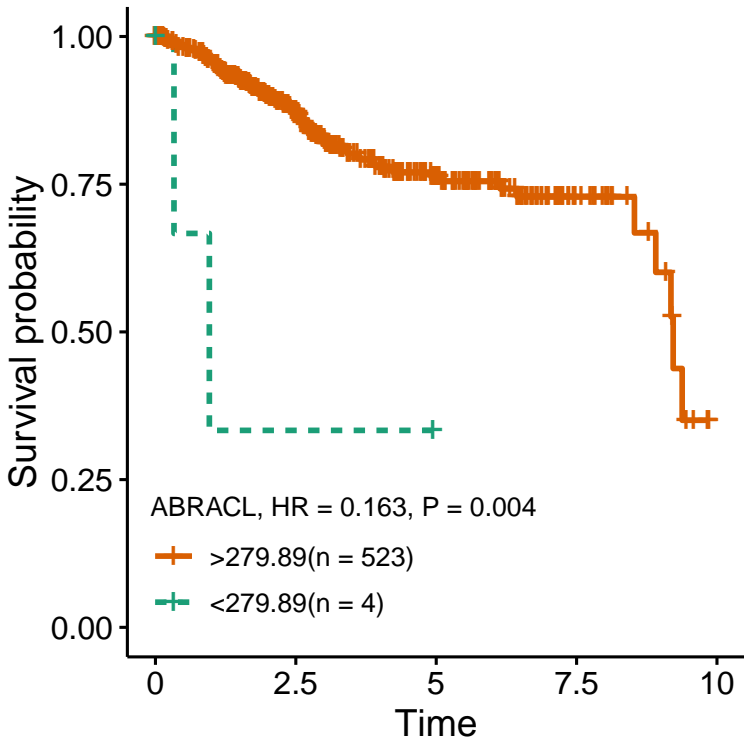

Supplement: Table_S11.zip [file Table_S11.zip]

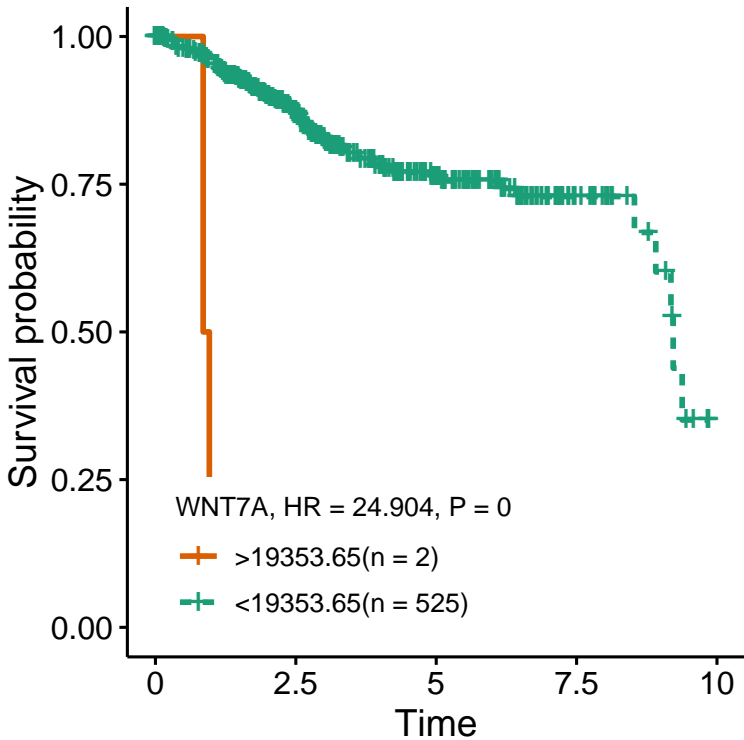

Supplement: Table_S11.zip [file Table_S11.zip]

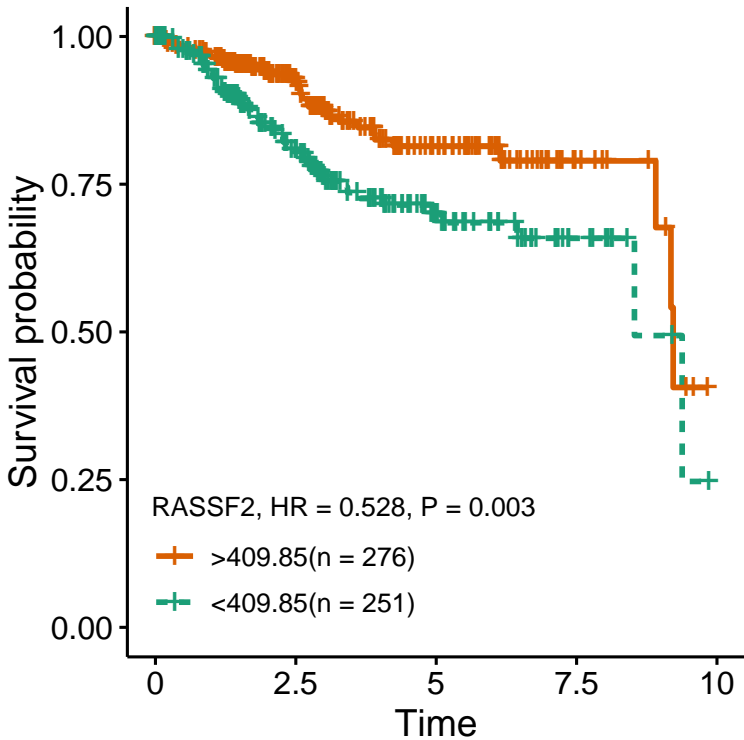

Supplement: Table_S11.zip [file Table_S11.zip]

Survival probability

1.00  
0.75  
0.50  
0.25  
0.00

0

2.5

5

7.5

10

Time

LRRK2, HR = 5.395, P = 0.008

+ >12.35(n = 475)

+ <12.35(n = 52)

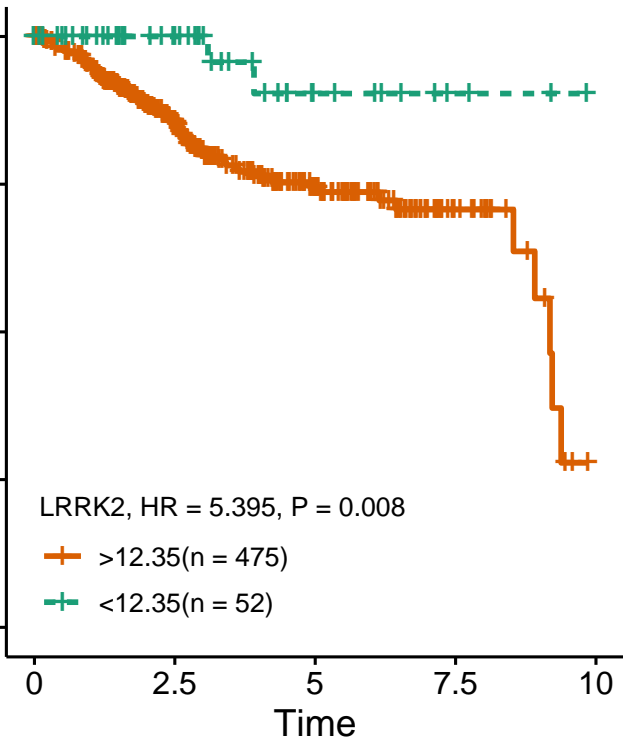

Supplement: Table_S11.zip [file Table_S11.zip]

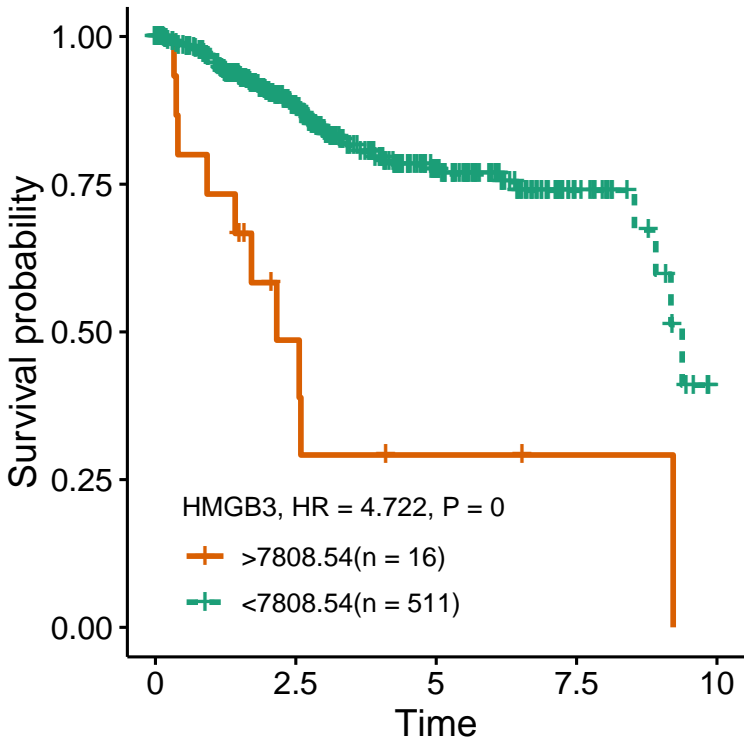

Supplement: Table_S11.zip [file Table_S11.zip]

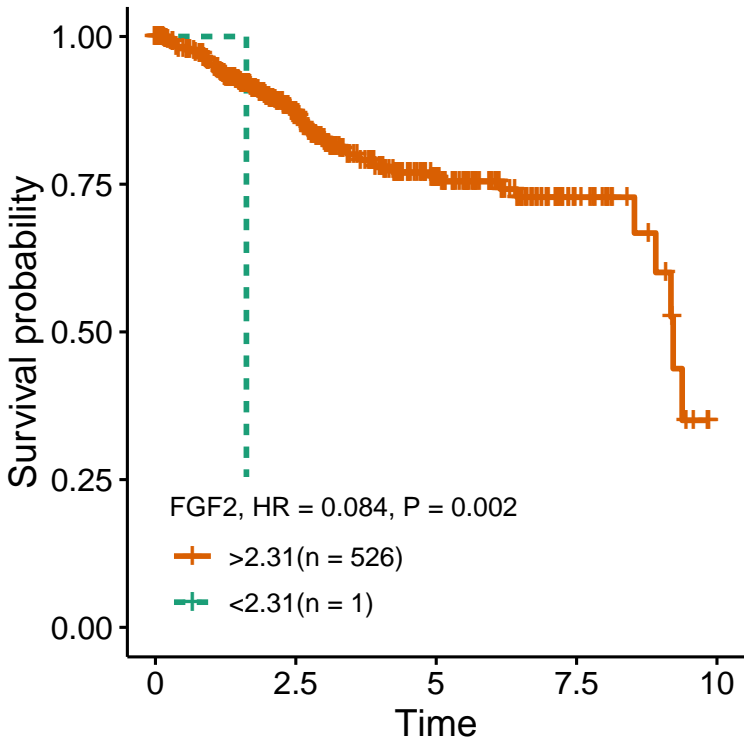

Supplement: Table_S11.zip [file Table_S11.zip]

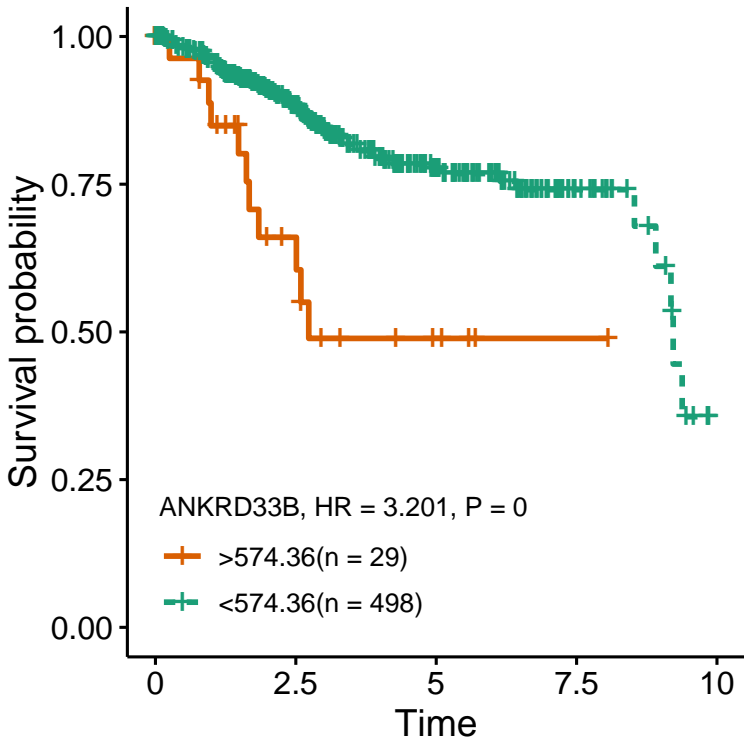

Supplement: Table_S11.zip [file Table_S11.zip]

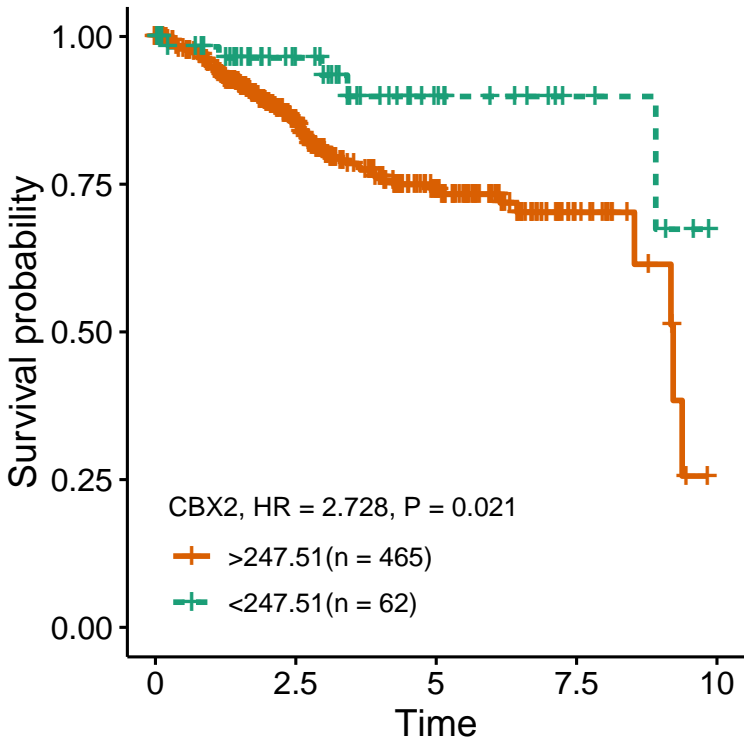

Supplement: Table_S11.zip [file Table_S11.zip]

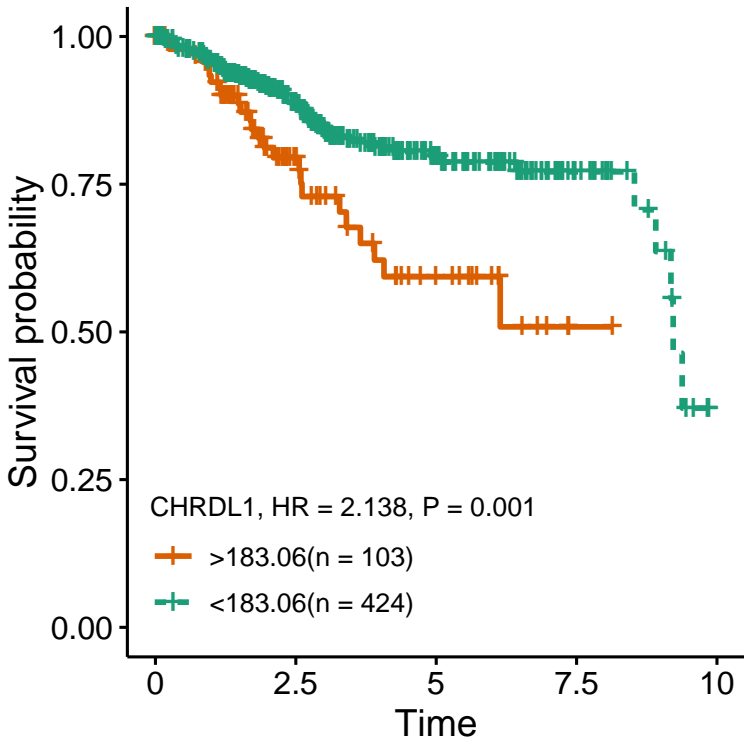

Supplement: Table_S11.zip [file Table_S11.zip]

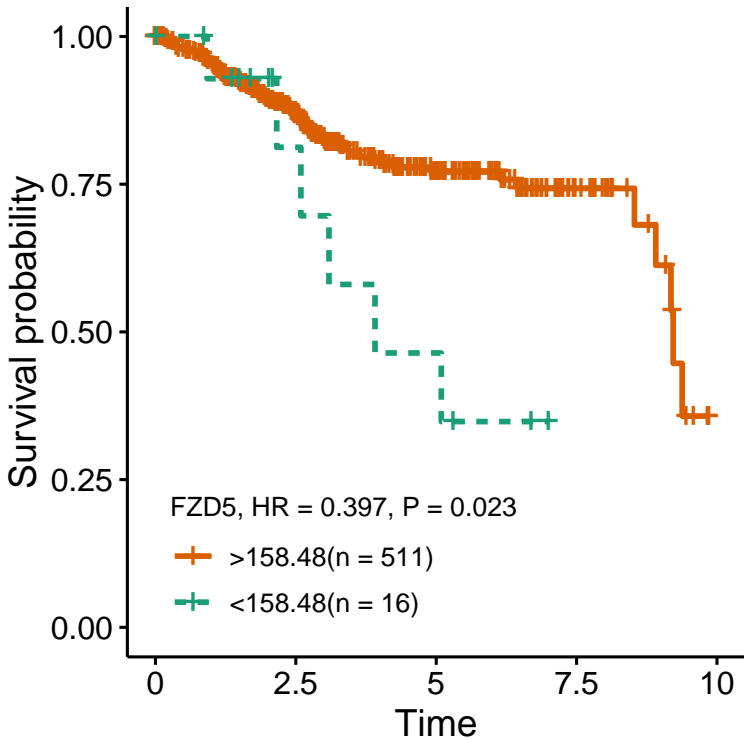

Supplement: Table_S11.zip [file Table_S11.zip]

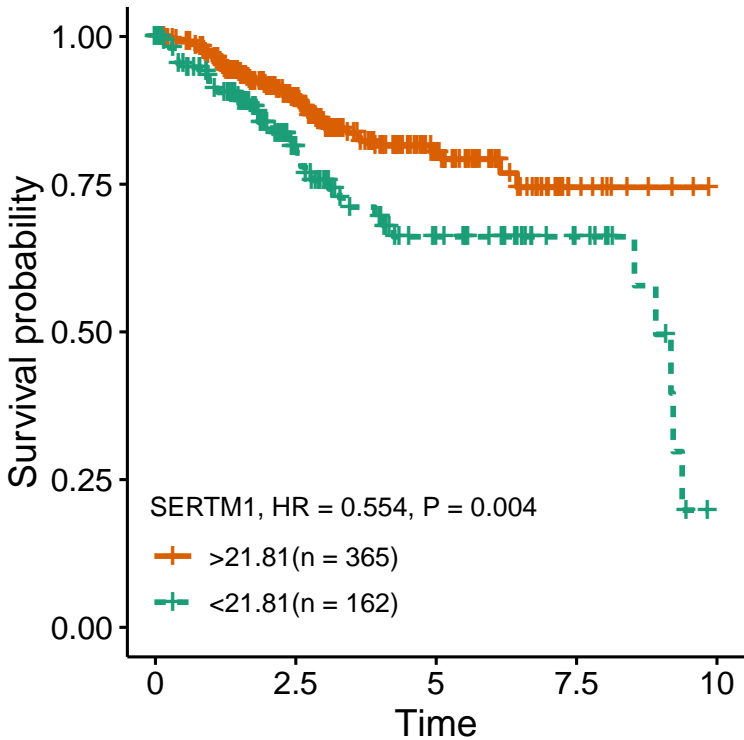

Supplement: Table_S11.zip [file Table_S11.zip]

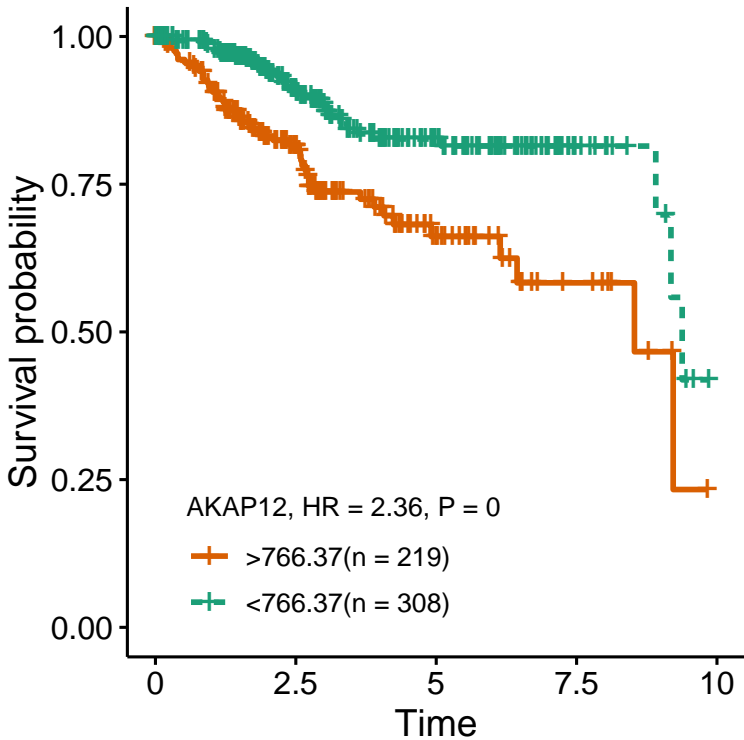

Supplement: Table_S11.zip [file Table_S11.zip]

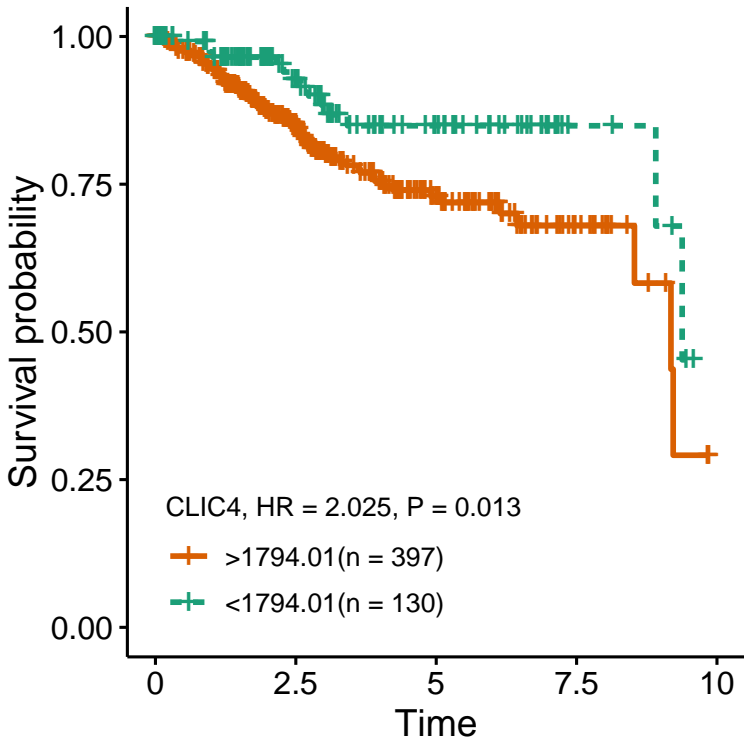

Supplement: Table_S11.zip [file Table_S11.zip]

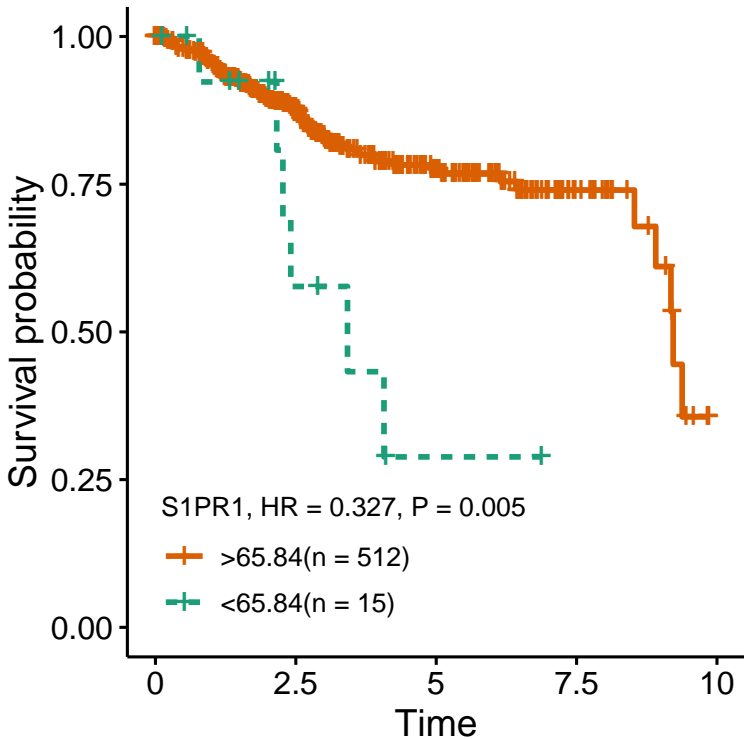

Supplement: Table_S11.zip [file Table_S11.zip]

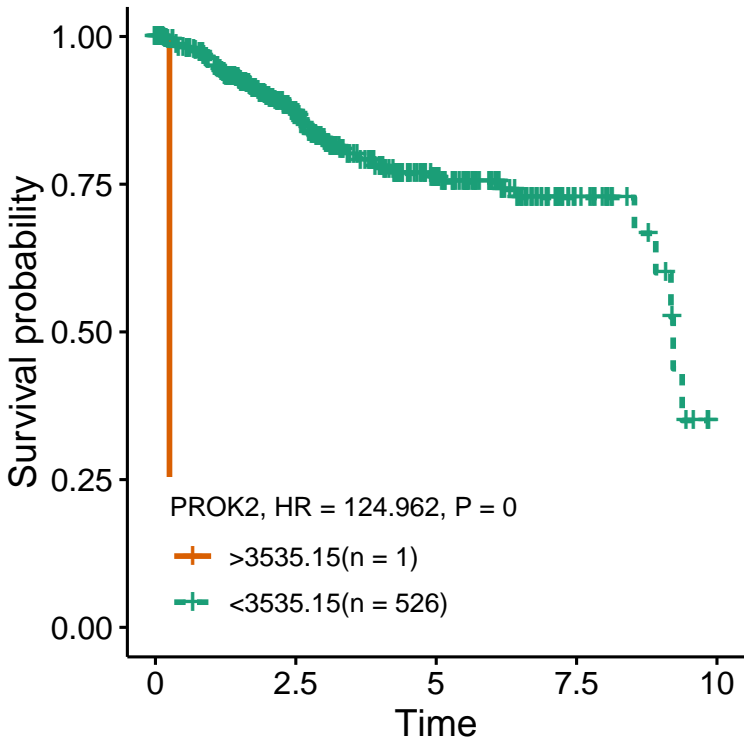

Supplement: Table_S11.zip [file Table_S11.zip]

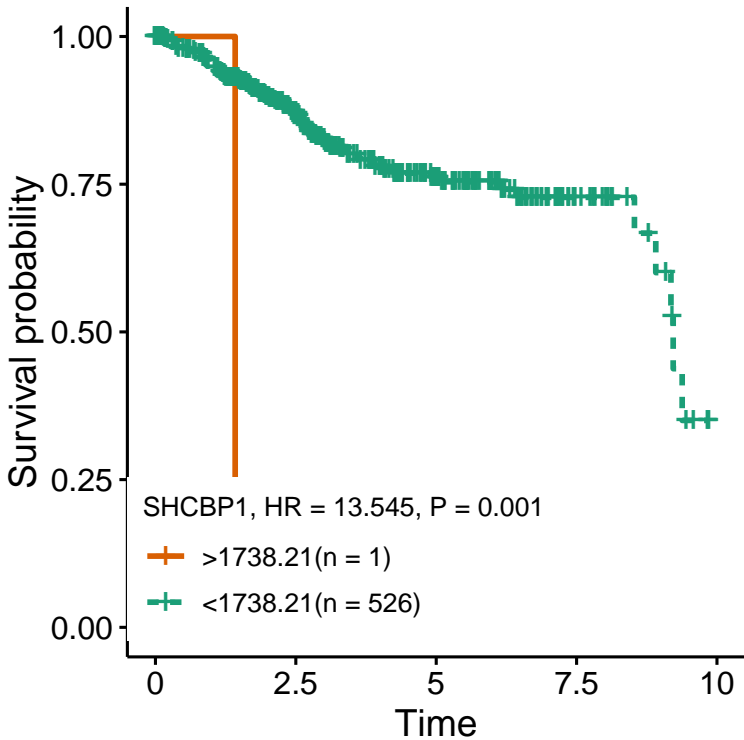

Supplement: Table_S11.zip [file Table_S11.zip]

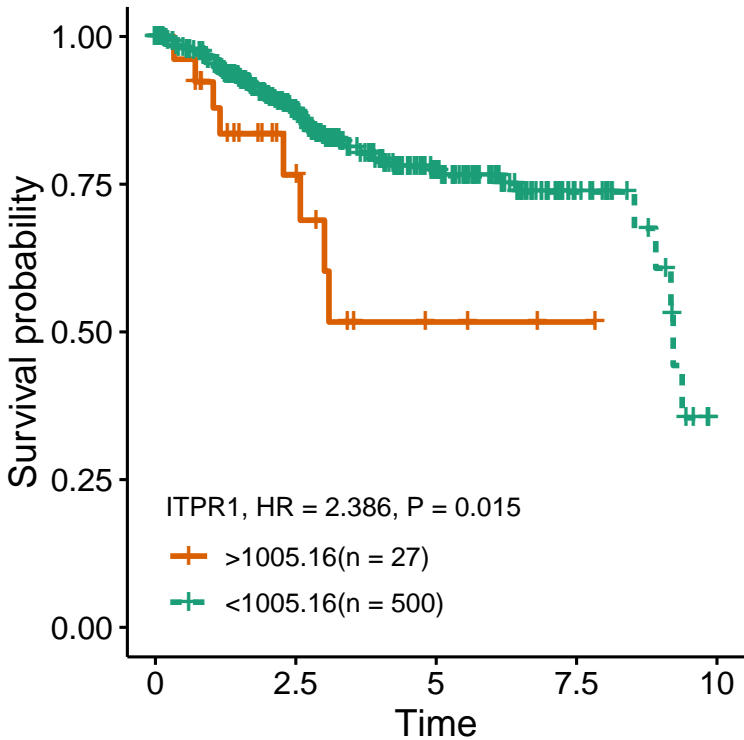

Supplement: Table_S11.zip [file Table_S11.zip]

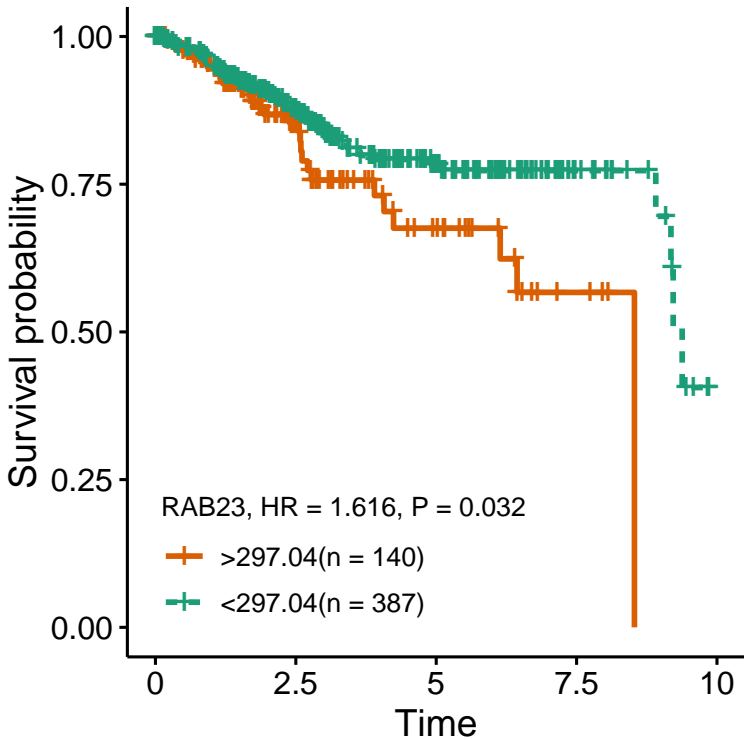

Supplement: Table_S11.zip [file Table_S11.zip]

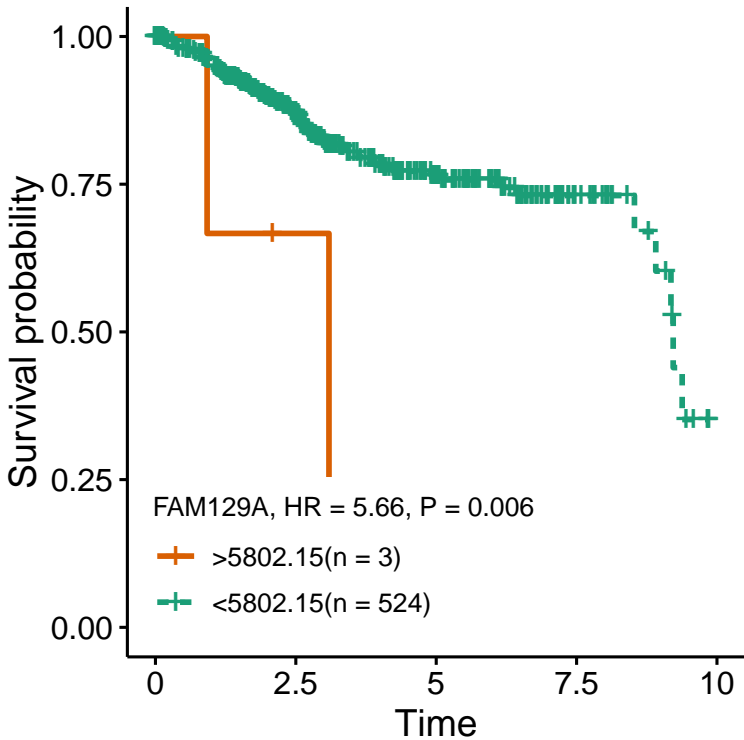

Supplement: Table_S11.zip [file Table_S11.zip]

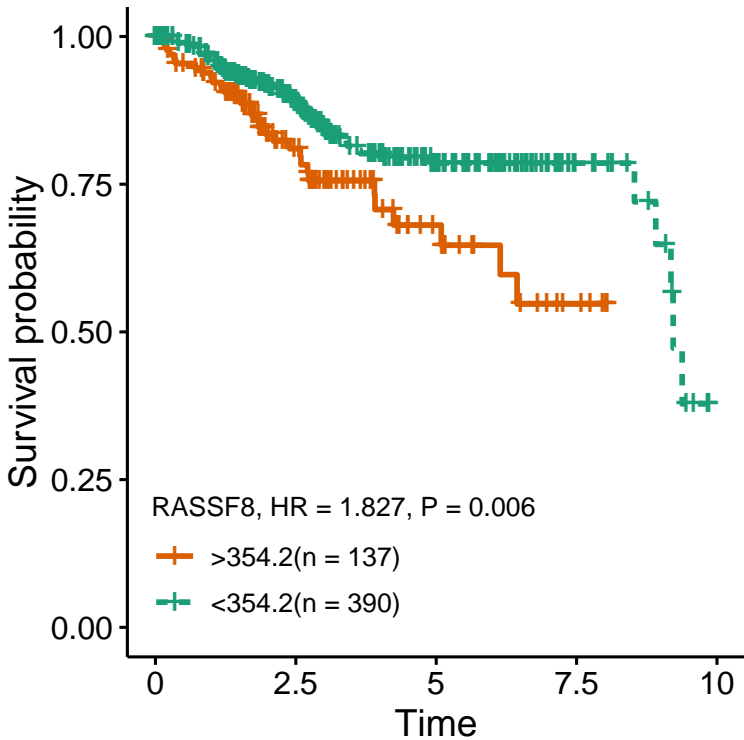

Supplement: Table_S11.zip [file Table_S11.zip]

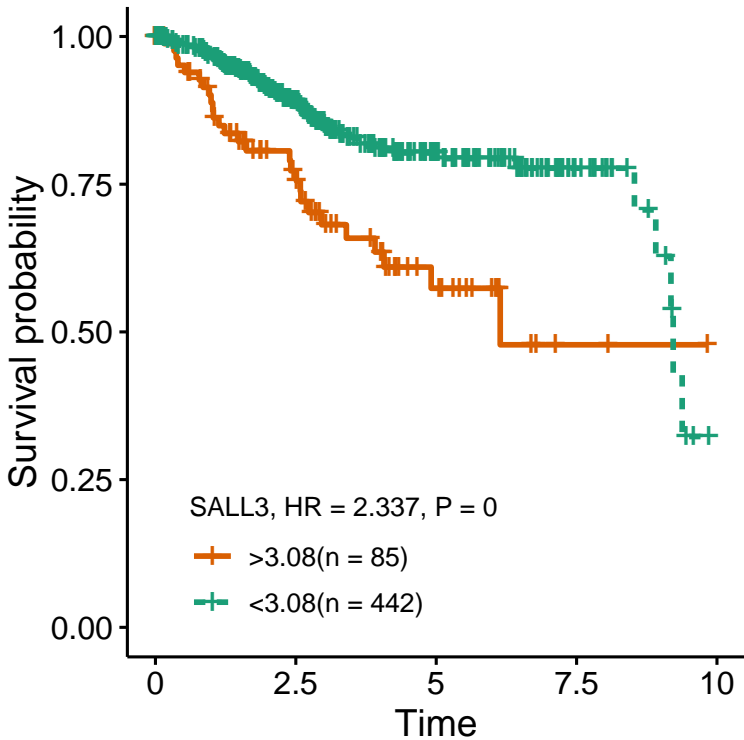

Supplement: Table_S11.zip [file Table_S11.zip]

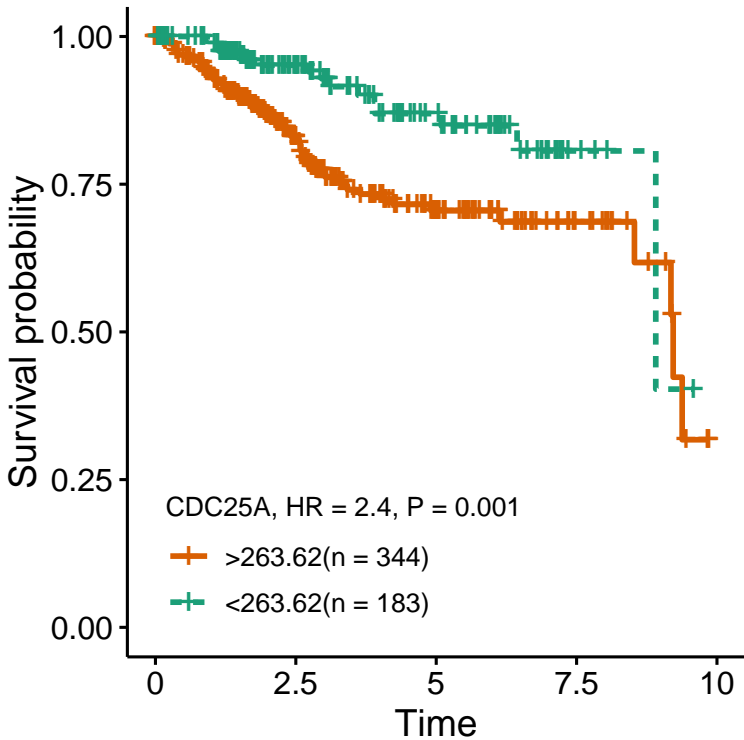

Supplement: Table_S11.zip [file Table_S11.zip]

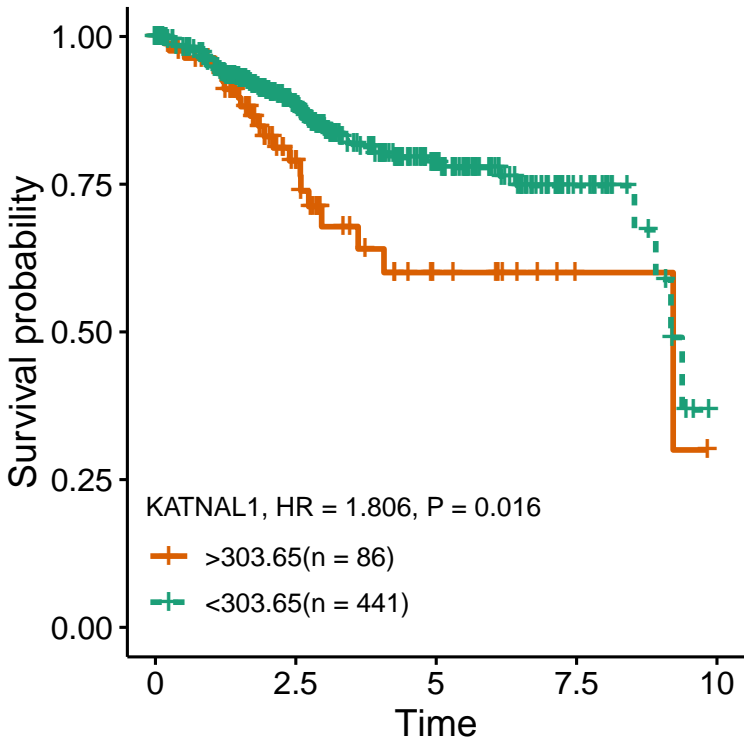

Supplement: Table_S11.zip [file Table_S11.zip]

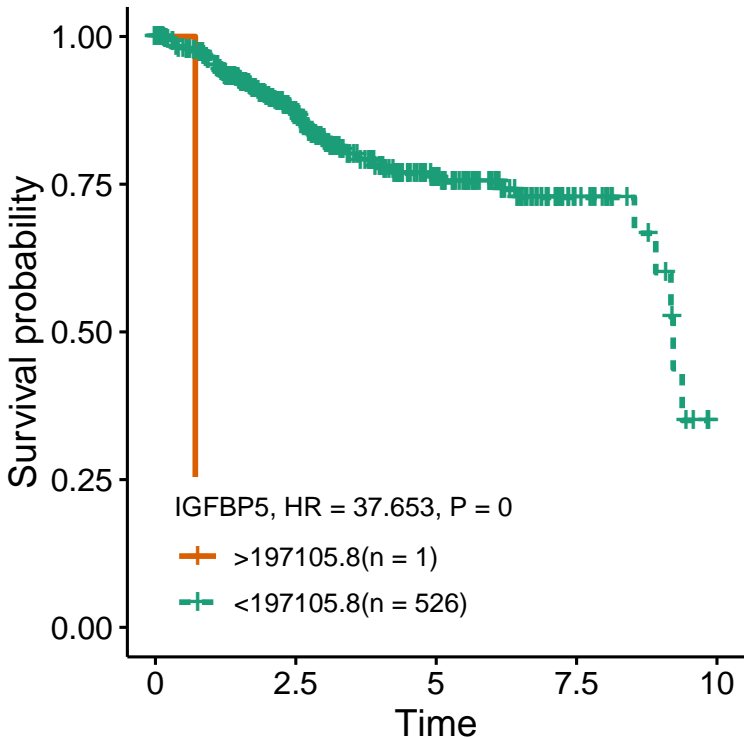

Supplement: Table_S11.zip [file Table_S11.zip]

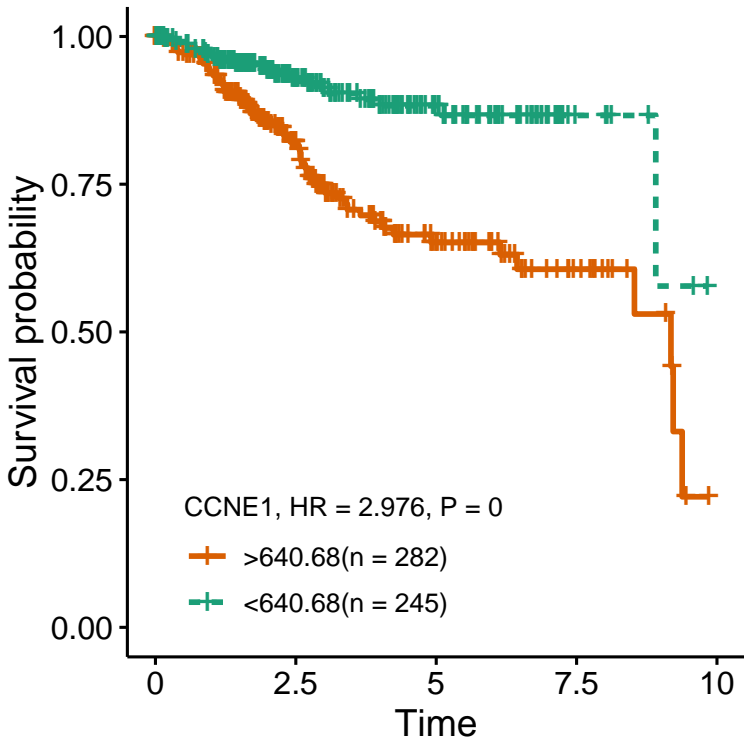

Supplement: Table_S11.zip [file Table_S11.zip]

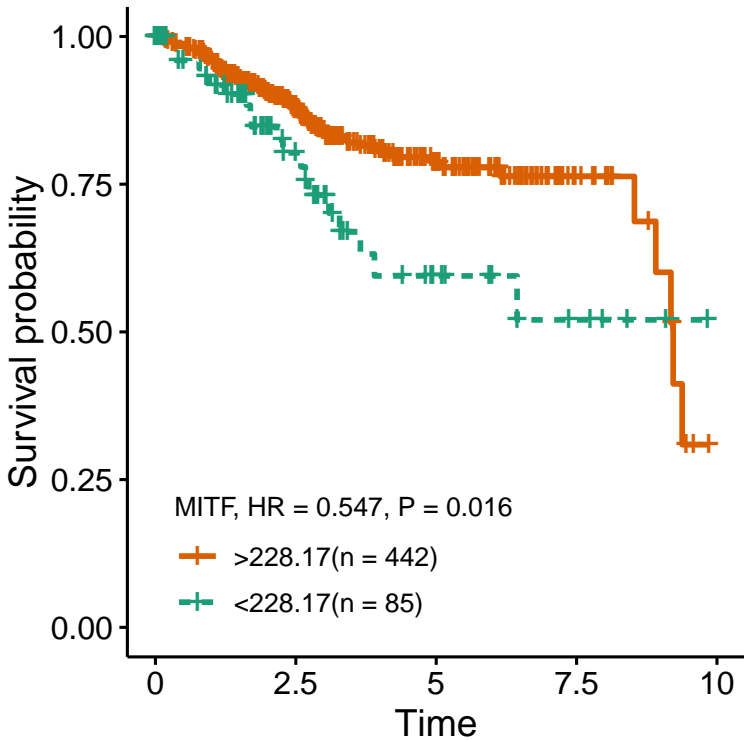

Supplement: Table_S11.zip [file Table_S11.zip]

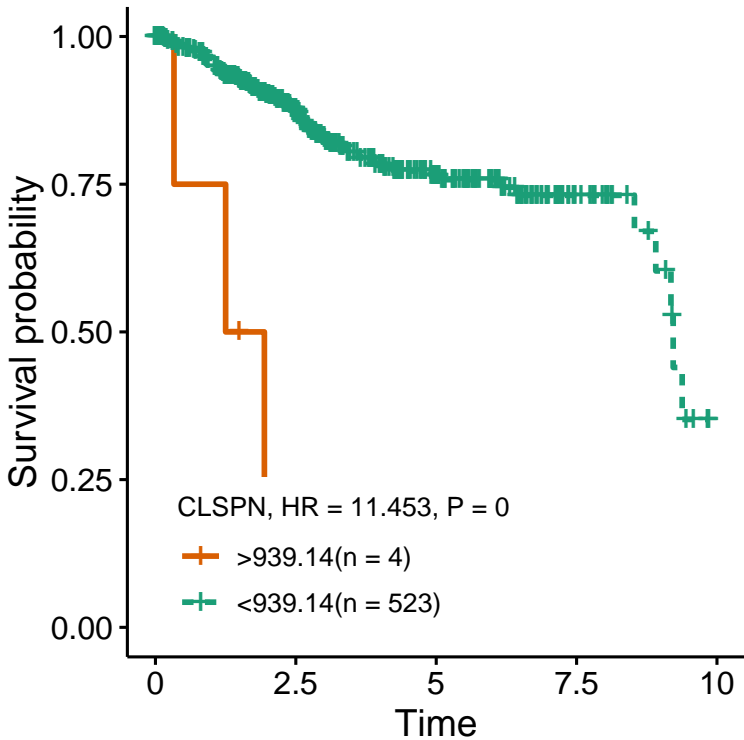

Supplement: Table_S11.zip [file Table_S11.zip]

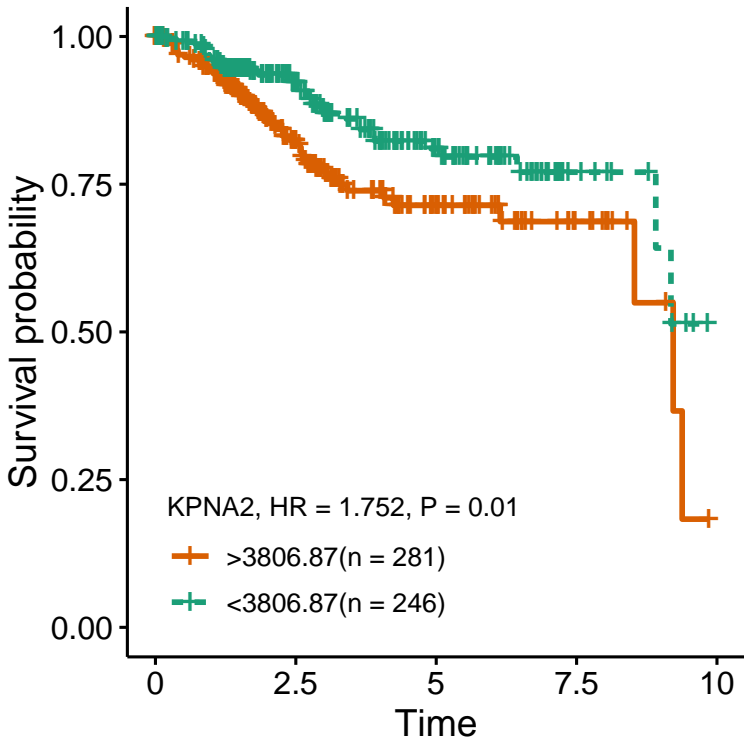

Supplement: Table_S11.zip [file Table_S11.zip]

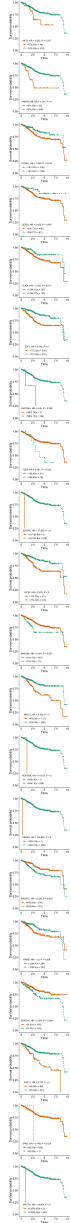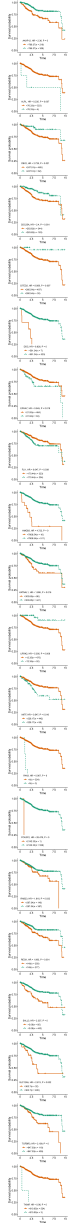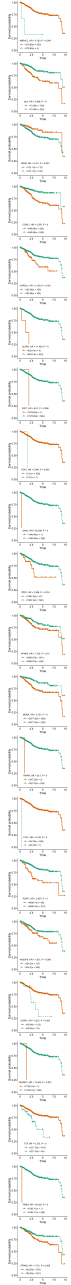

Supplement: Table_S11.zip [file Table_S11.zip]

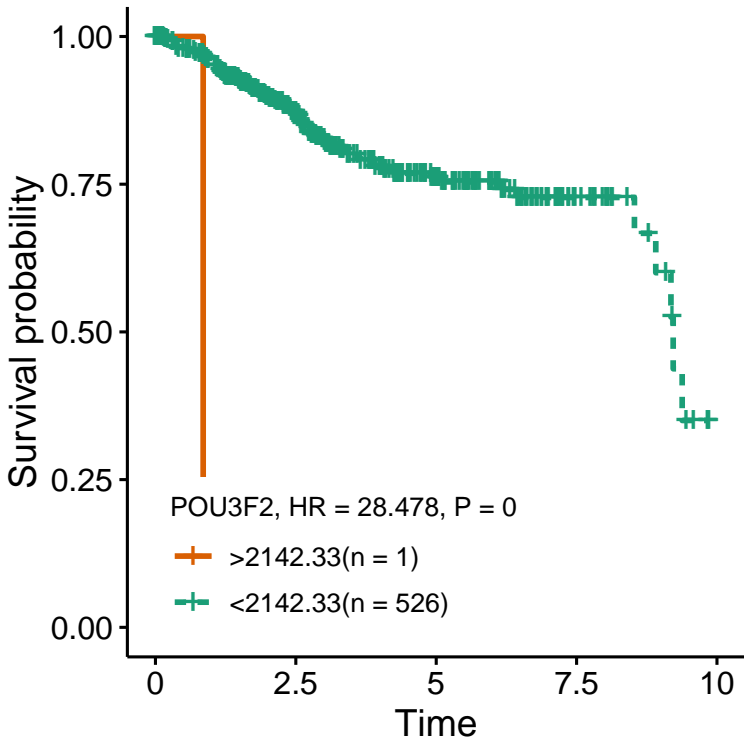

Supplement: Table_S11.zip [file Table_S11.zip]

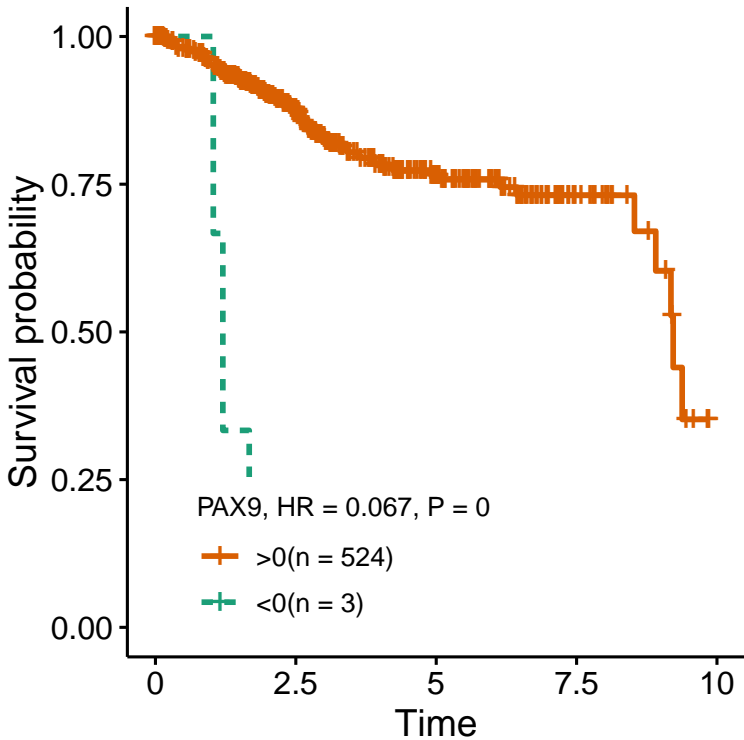

Supplement: Table_S11.zip [file Table_S11.zip]

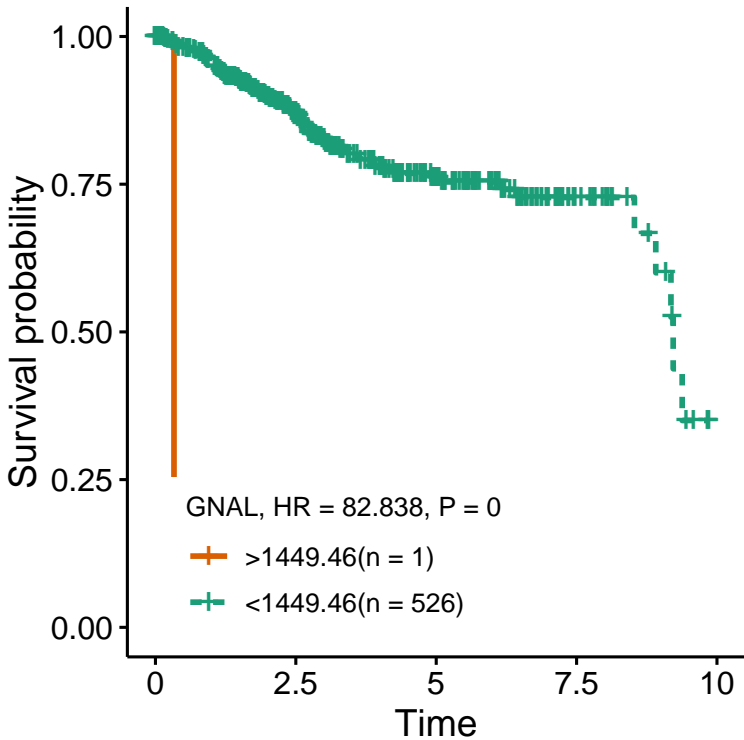

Supplement: Table_S11.zip [file Table_S11.zip]

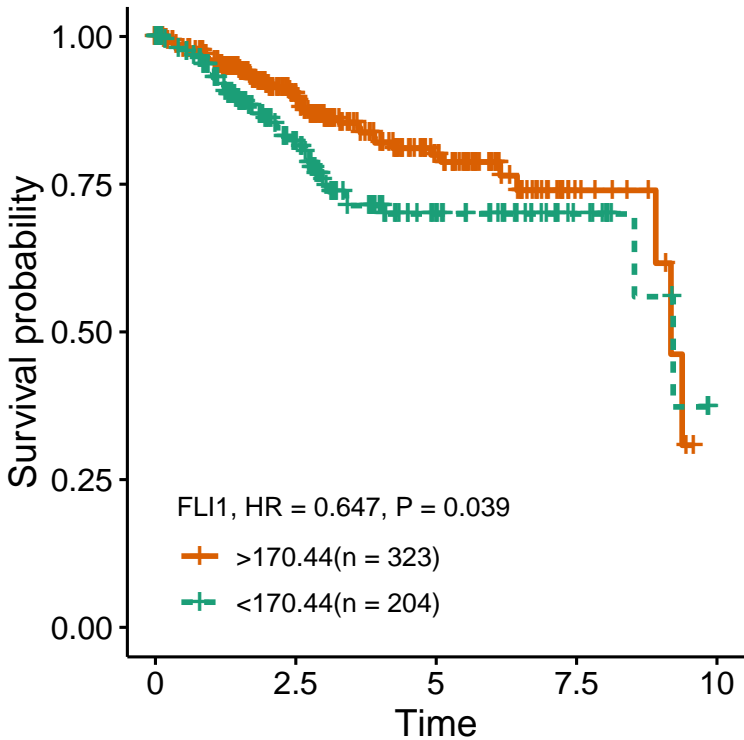

Supplement: Table_S11.zip [file Table_S11.zip]

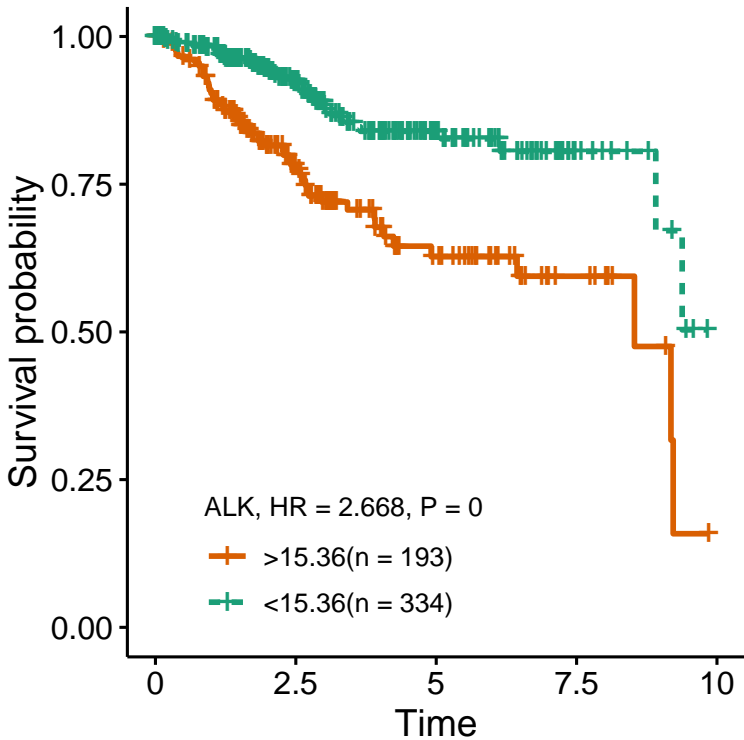

Supplement: Table_S11.zip [file Table_S11.zip]

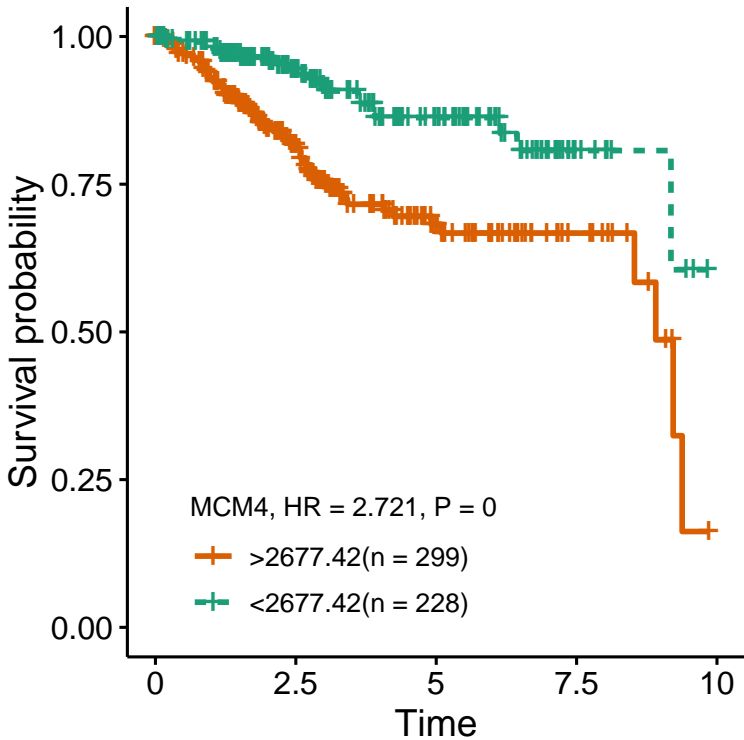

Supplement: Table_S11.zip [file Table_S11.zip]

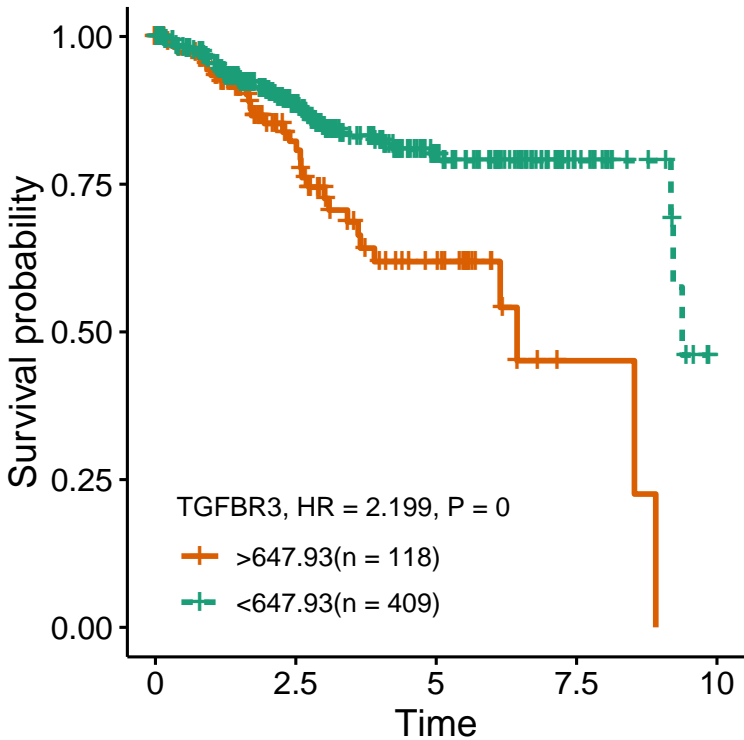

Supplement: Table_S11.zip [file Table_S11.zip]

Survival probability

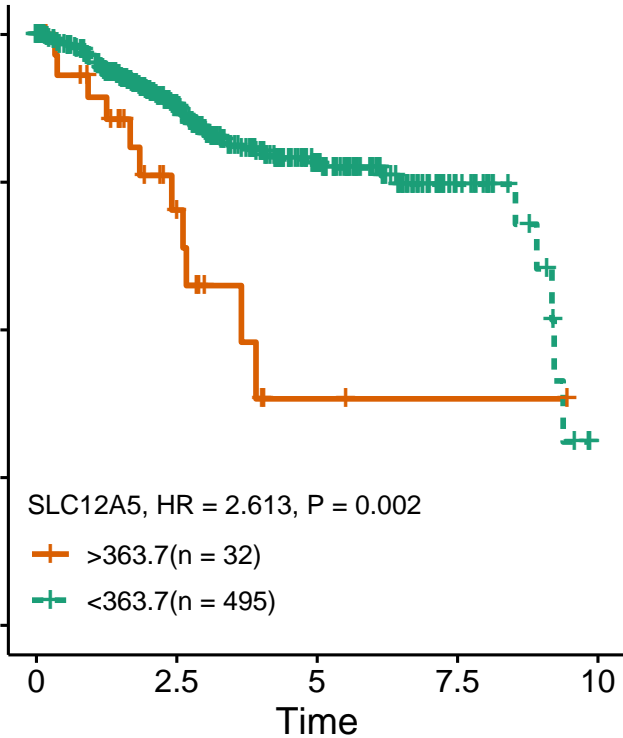

Supplement: Table_S11.zip [file Table_S11.zip]

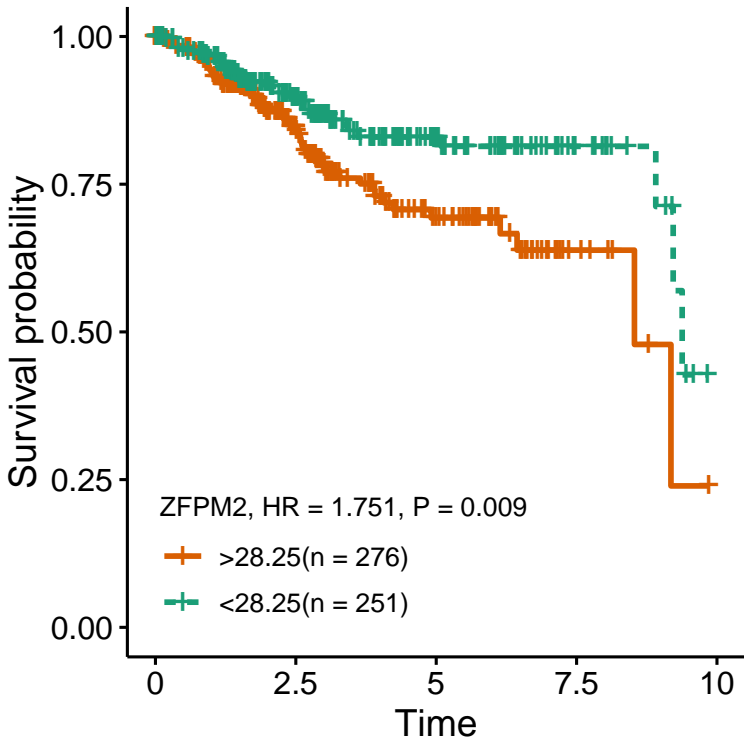

Supplement: Table_S11.zip [file Table_S11.zip]

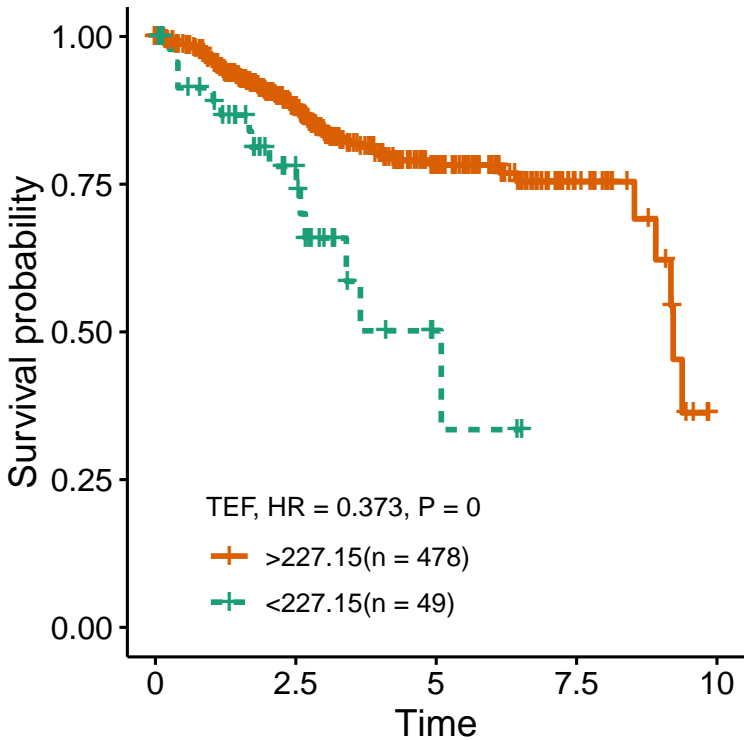

Supplement: Table_S11.zip [file Table_S11.zip]

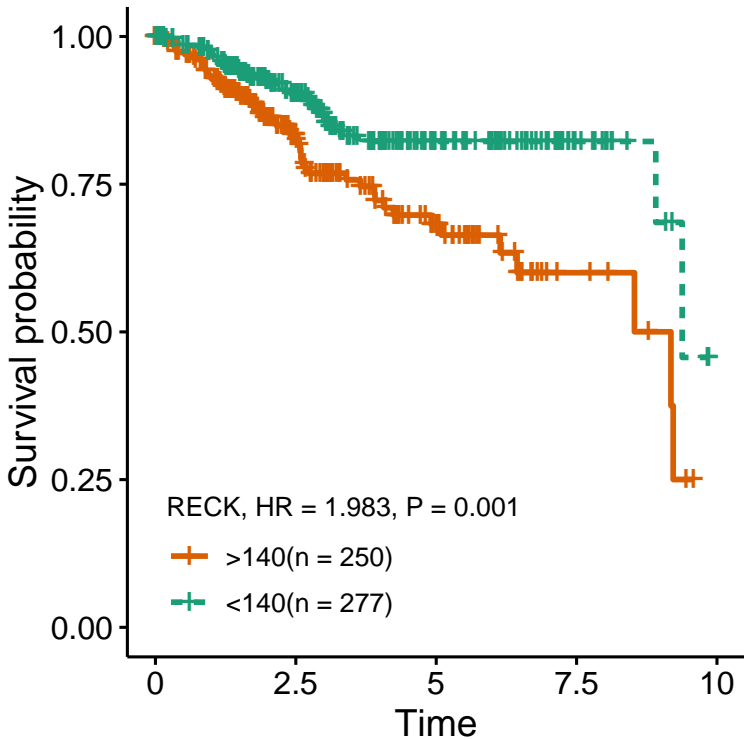

Supplement: Table_S11.zip [file Table_S11.zip]

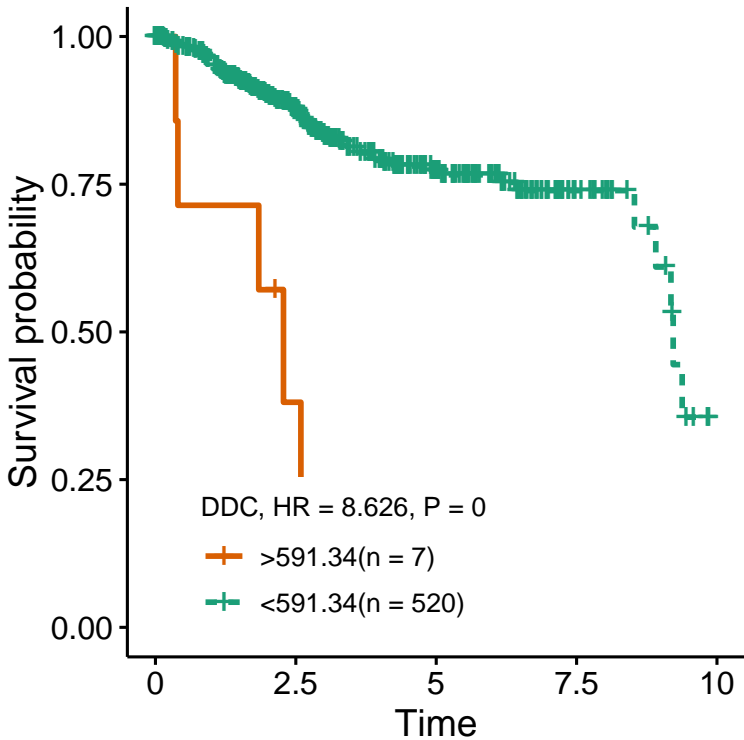

Supplement: Table_S11.zip [file Table_S11.zip]

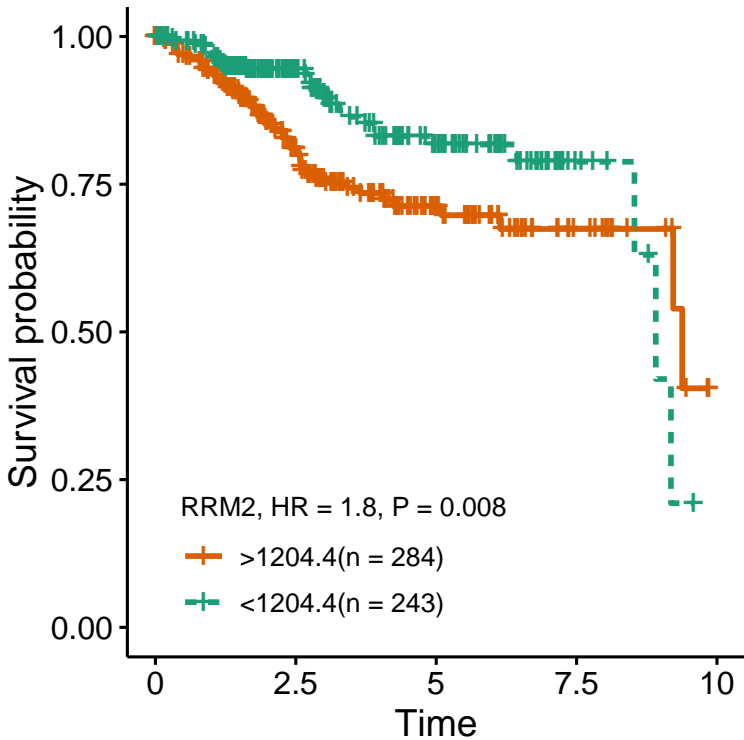

Supplement: Table_S11.zip [file Table_S11.zip]

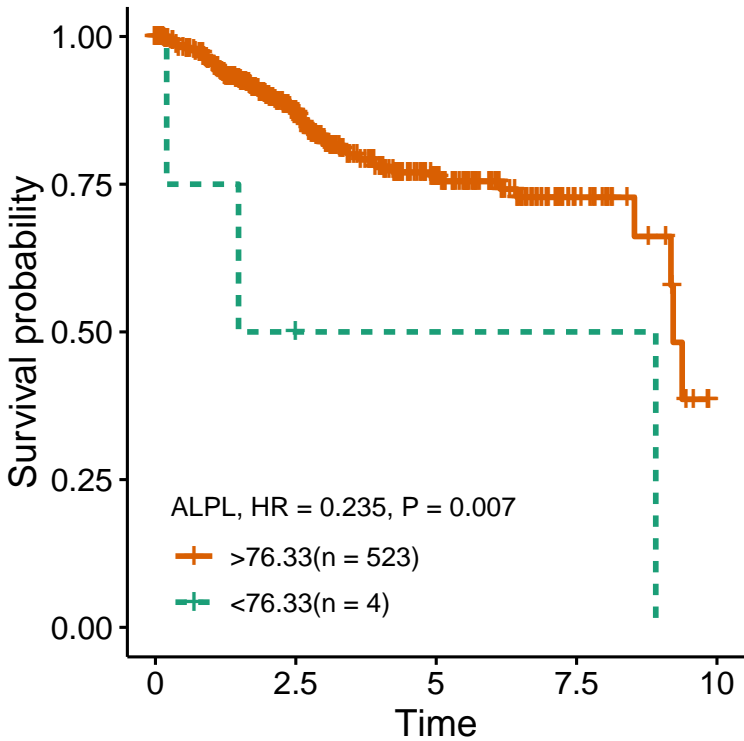

Supplement: Table_S11.zip [file Table_S11.zip]

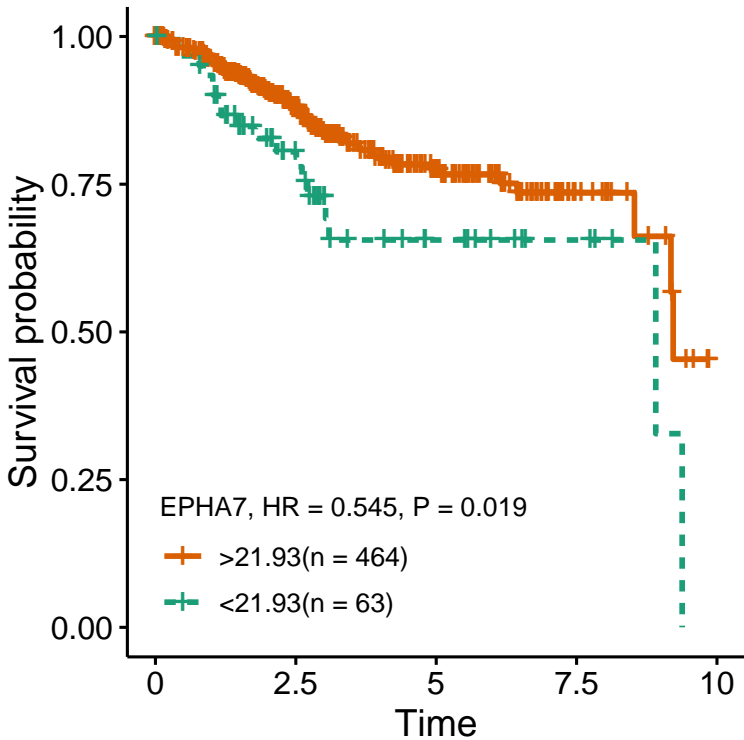

Supplement: Table_S11.zip [file Table_S11.zip]

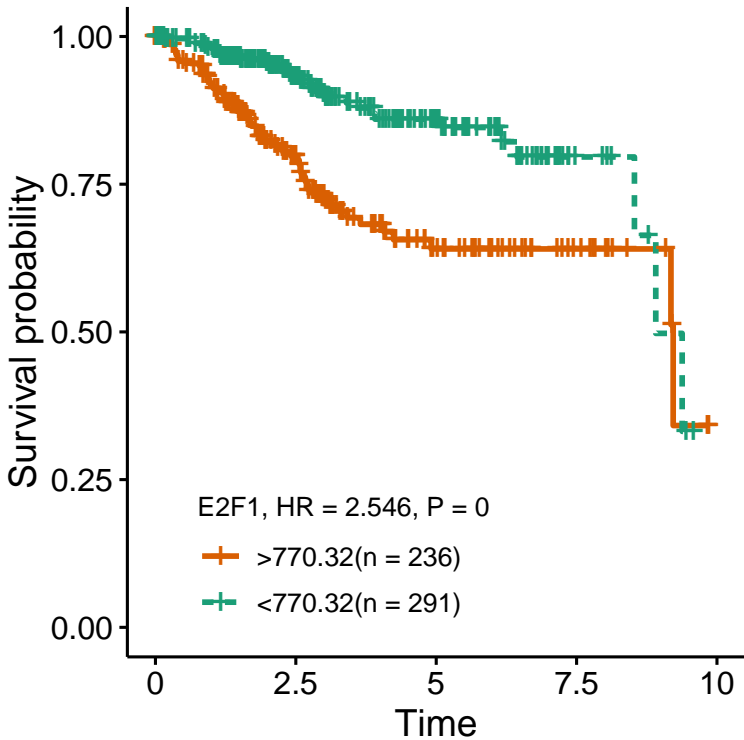

Supplement: Table_S11.zip [file Table_S11.zip]

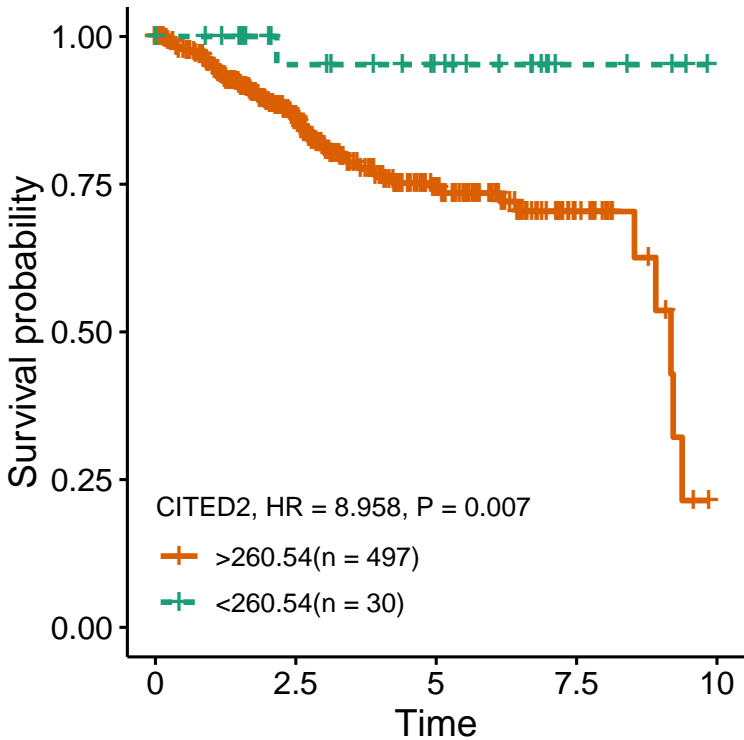

Supplement: Table_S11.zip [file Table_S11.zip]

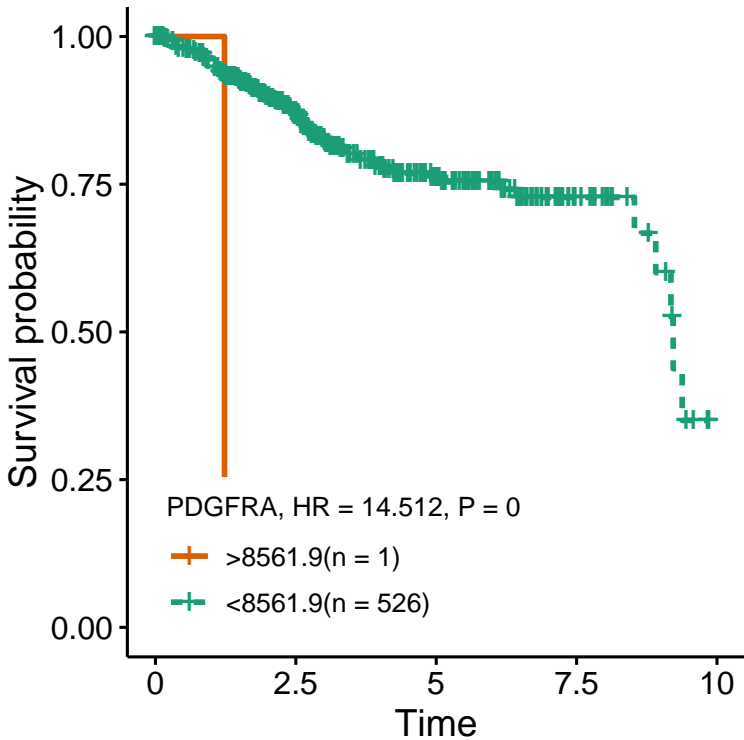

Supplement: Table_S11.zip [file Table_S11.zip]

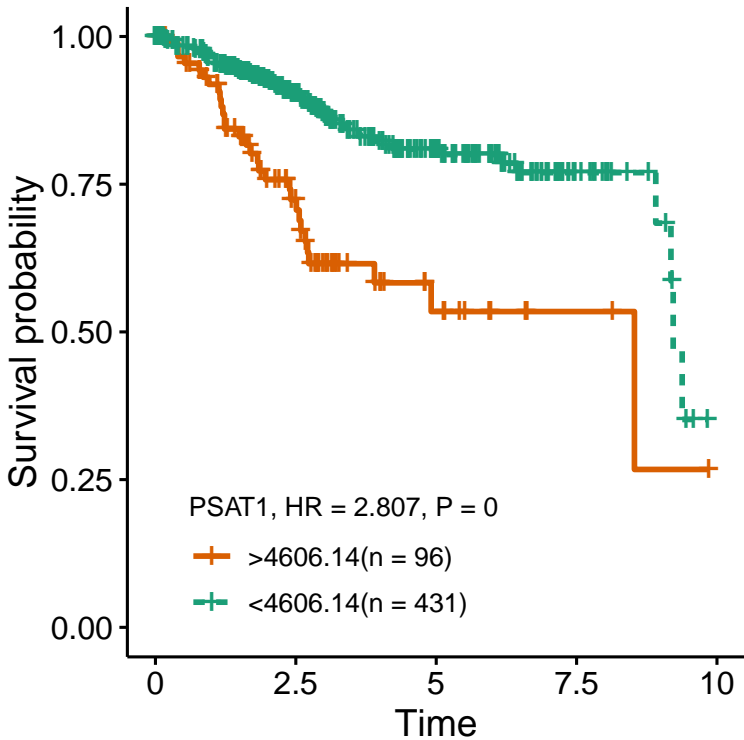

Supplement: Table_S11.zip [file Table_S11.zip]

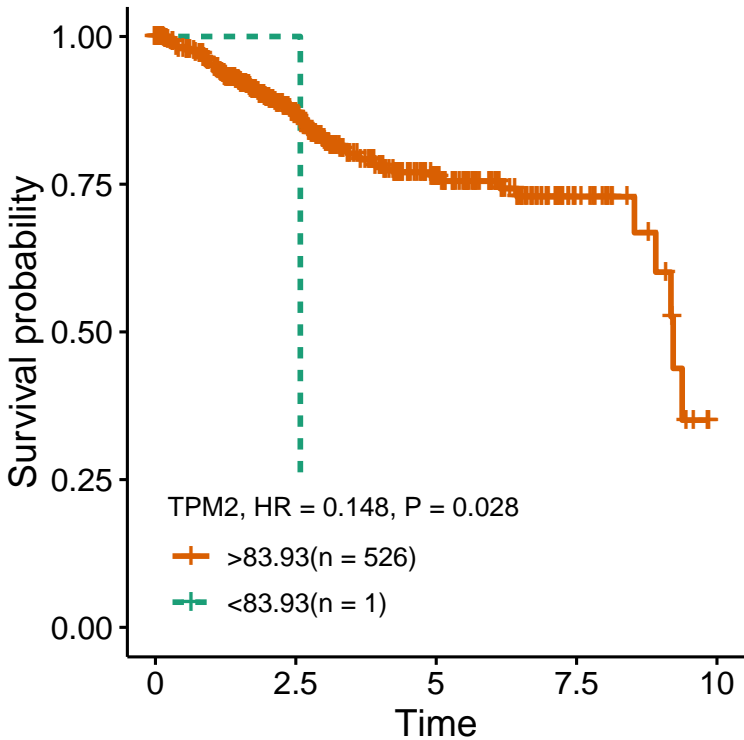

Supplement: Table_S11.zip [file Table_S11.zip]

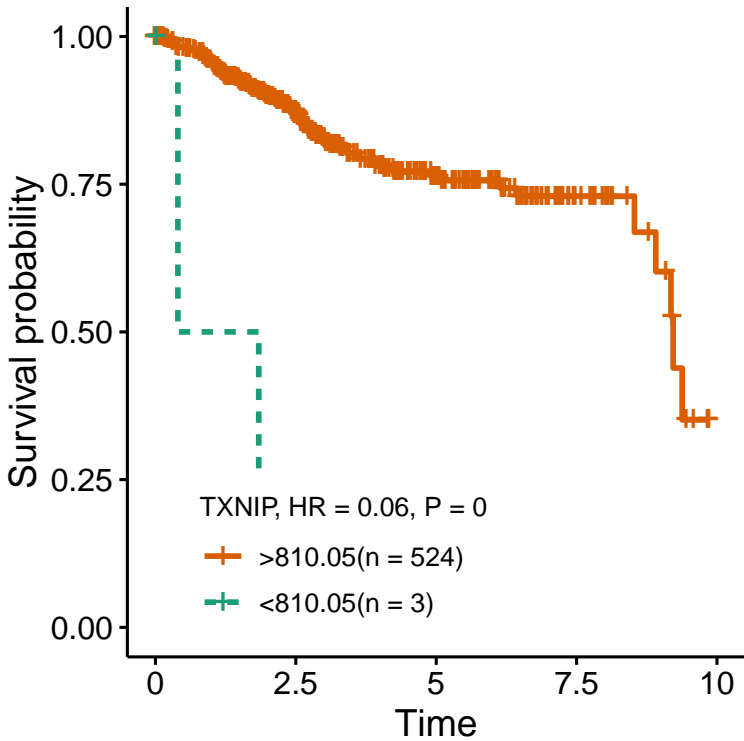

Supplement: Table_S11.zip [file Table_S11.zip]

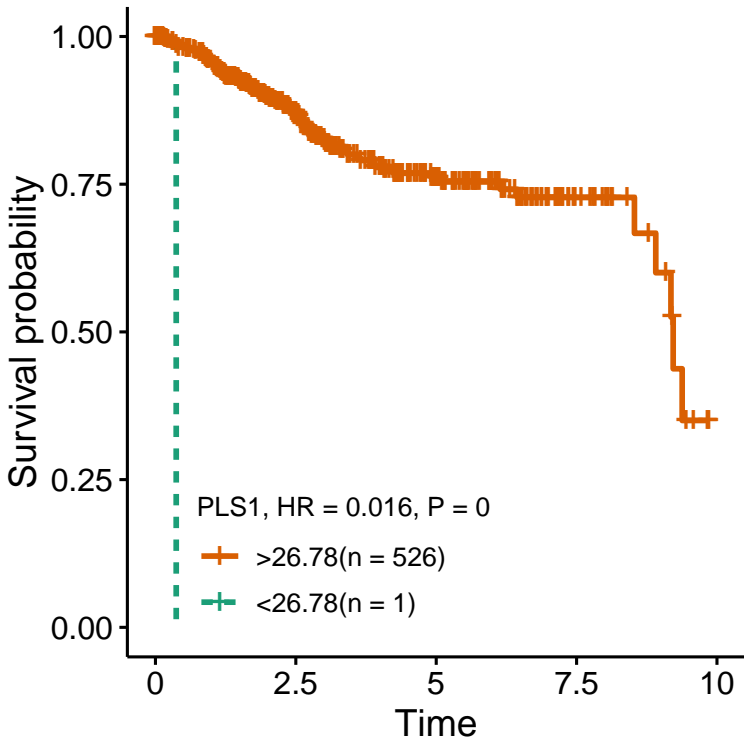

Supplement: Table_S11.zip [file Table_S11.zip]

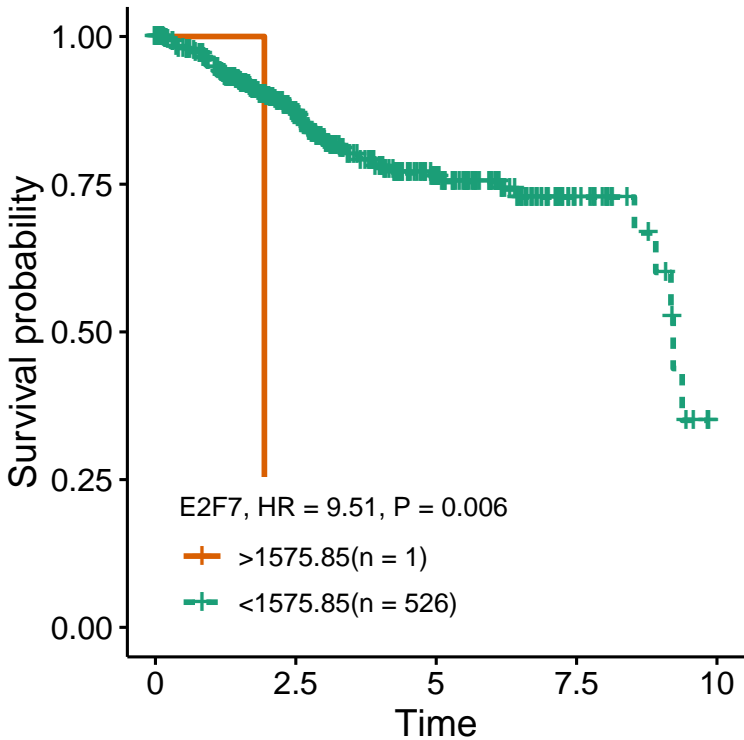

Supplement: Table_S11.zip [file Table_S11.zip]

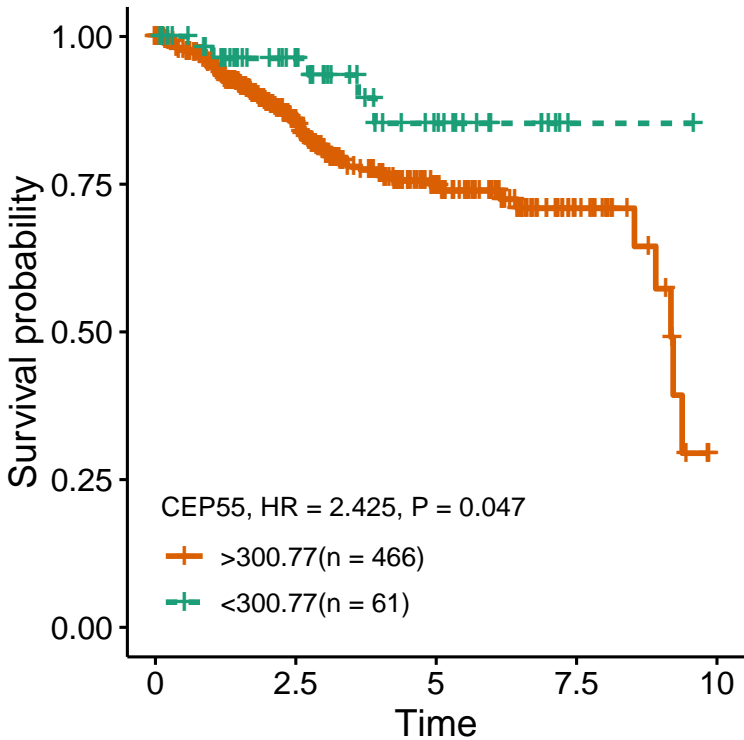

Supplement: Table_S11.zip [file Table_S11.zip]

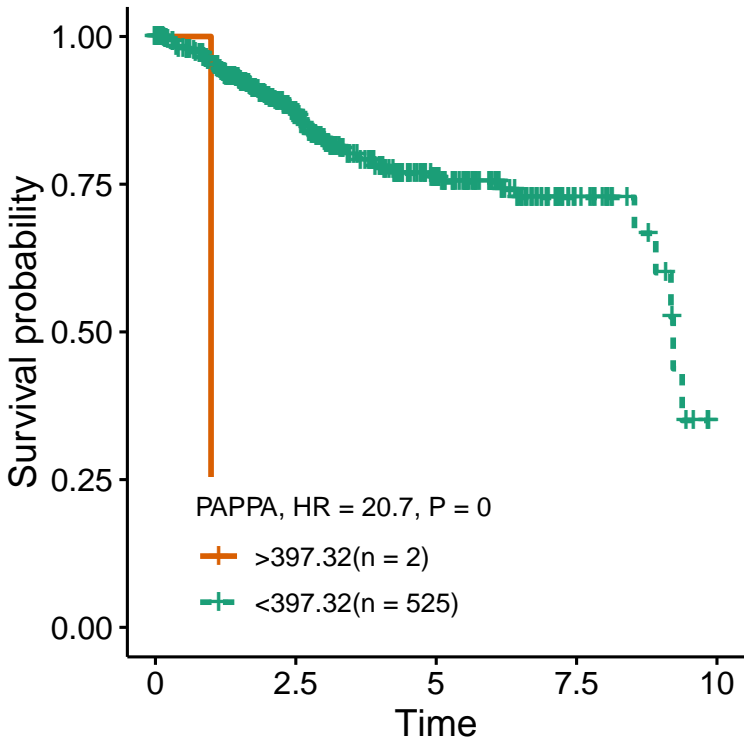

Supplement: Table_S11.zip [file Table_S11.zip]
